1 Mitochondrial copper and phosphate transporter specificity was defined early in the evolution  
2 of eukaryotes

3

4 Xinyu Zhu<sup>1\*</sup>, Aren Boulet<sup>2\*</sup>, Katherine M. Buckley<sup>1\*</sup>, Casey B. Phillips<sup>1</sup>, Micah G. Gammon<sup>1</sup>, Laura  
5 E. Oldfather<sup>1</sup>, Stanley A. Moore<sup>2</sup>, Scot C. Leary<sup>2</sup> and Paul A. Cobine<sup>1 §</sup>

6

7 <sup>1</sup>Department of Biological Sciences, Auburn University, Auburn, AL, USA

8 <sup>2</sup>Department of Biochemistry, Microbiology and Immunology, University of Saskatchewan,  
9 Saskatoon, SK, Canada.

10

11 \* These authors contributed equally to this work

12 § Correspondence should be addressed to: PAC [paul.cobine@auburn.edu](mailto:paul.cobine@auburn.edu)

13

14 **KEYWORDS:** mitochondrial carrier family; copper; copper transport, phosphate transport,  
15 mitochondria, evolution, gene duplications

16 **Abstract**

17 Mitochondrial carrier family (MCF/SLC25) proteins are selective transporters that  
18 maintain the mitochondrial metabolome. Here we combine computational, biochemical and  
19 phenotypic approaches to understand substrate selectivity of SLC25A3. In mammals, SLC25A3  
20 transports both copper and phosphate, yet in *Saccharomyces cerevisiae* the transport of these  
21 substrates is partitioned across two paralogs: PIC2, which transports copper, and MIR1, which  
22 transports phosphate. To understand whether the ancestral state of this transporter was a single  
23 promiscuous transporter that duplicated and gained selectivity, we explored the evolutionary  
24 relationships of PIC2 and MIR1 orthologs across the eukaryotic tree of life. Phylogenetic analyses  
25 reveal that PIC2-like and MIR1-like orthologs are present in all major eukaryotic supergroups,  
26 indicating that the gene duplication that created these paralogs occurred early in eukaryotic  
27 evolution. Frequent lineage-specific gene duplications and losses suggest that substrate  
28 specificity may be evolutionarily labile. To link this phylogenetic signal to protein function and  
29 resolve the residues involved in substrate selection, we used structural modelling and site-  
30 directed mutagenesis to identify PIC2 residues involved in copper and phosphate transport  
31 activities. Based on these analyses, we generated a Leu175Ala variant of mouse SLC25A3 that  
32 retains the ability to transport copper, but not phosphate, and rescues the cytochrome *c* oxidase  
33 defect in *SLC25A3* knockout cells. Taken together, this work uses an evolutionary framework to  
34 uncover amino acids involved in substrate recognition by MCF proteins responsible for copper  
35 and phosphate transport.

36

## 37 Introduction

38 Mitochondrial carrier family (MCF/SLC25) proteins comprise the largest family of  
39 mitochondrial inner membrane (IM) proteins and are responsible for transporting numerous  
40 substrates including Krebs cycle intermediates, nucleoside di- and triphosphates for energy  
41 metabolism and nucleotide replication, amino acids for degradation or maintenance of the urea  
42 cycle, and essential metals such as copper (Cu) and iron (1, 2). Structurally, MCF transporters  
43 consist of a conserved fold with three repeats that contain two transmembrane helices  
44 connected by a short  $\alpha$ -helical loop (3, 4). The repeated structural elements and variable copy  
45 numbers across eukaryotic phyla (53 in humans and 30 in yeast) suggest that this complex gene  
46 family has arisen through multiple duplication events followed by neofunctionalization as  
47 substrate needs changed. From an evolutionary perspective, one hypothesis is that protein  
48 families with multiple substrates (e.g., enzymes and transporters) arose as generalists that  
49 duplicated to evolve specificity over time (5, 6). However, the evolutionary history of the  
50 MCF/SLC25 family with respect to substrate specificity remains largely unexplored.

51 Our current mechanistic understanding of MCF activity is based on *in vitro* transport  
52 assays, phenotypic observations made in mutant cells and structures of the ADP-ATP carrier (4,  
53 7). This MCF transporter adopts two conformational states: the cytoplasmic or c-state which is  
54 open to the intermembrane space (IMS), and the matrix or m-state which is open to the matrix  
55 (8, 9). All MCFs have six transmembrane helices with conserved motifs that allow for formation  
56 of salt bridges and the close packing of helices that are critical to the mechanism of transport (4).

57 Cu is required in mitochondria for the stability and activity of the IM-embedded enzyme  
58 cytochrome *c* oxidase (COX) and the IMS-localized superoxide dismutase. The Cu used in the

59 assembly of these enzymes comes from a pool in the mitochondrial matrix (10). We previously  
60 identified PIC2 as a mitochondrial Cu transporter in *Saccharomyces cerevisiae* (11). Mutant yeast  
61 strains lacking *PIC2* (*pic2Δ*) are deficient in COX activity and have lower mitochondrial Cu levels  
62 than isogenic wild-type strains (11). Although PIC2 has also been implicated in phosphate  
63 transport (12-15), the major phosphate transporting MCF in yeast is MIR1 (13, 16). *PIC2*  
64 expression can complement *mir1Δ* phenotypes and mitochondria from *mir1Δpic2Δ* yeast strains  
65 regain phosphate transport activity when PIC2 is overexpressed (12), suggesting that phosphate  
66 can be a PIC2 substrate. However, it is unlikely that this transport activity is physiologically  
67 relevant under normal conditions as *PIC2* deletion does not result in phosphate deficiency  
68 phenotypes in yeast. Based on these findings, we predict that while yeast PIC2 and MIR1 have  
69 specialized to transport specific substrates, PIC2 retains some level of promiscuity for Cu and  
70 phosphate.

71 In contrast, humans express a single PIC2/MIR1 paralog, SLC25A3, which serves as the  
72 major mitochondrial transporter of both Cu and phosphate (17, 18). Cells lacking *SLC25A3* exhibit  
73 a Cu-dependent COX assembly defect (17). Additionally, SLC25A3 transports Cu when  
74 recombinantly expressed and reconstituted in liposomes or when heterologously expressed in  
75 *Lactococcus lactis* (17). Similarly, both phenotypic and biochemical assays confirm that SLC25A3  
76 is the major phosphate transporter in mammalian mitochondria (14, 18, 19).

77 These findings highlight a major unanswered question in our understanding of MCFs.  
78 Specifically, what differences enable the transport of single versus multiple substrates? Using  
79 newly available phylogenomic data from diverse lineages that span the major eukaryotic  
80 supergroups, we used an evolutionary framework to infer residues in the PIC2-MIR1 MCF

81 subfamily that likely mediate substrate selection and transport. By coupling phylogenetic  
82 analyses with biochemical assays, we have uncovered residues required for transport of Cu and  
83 phosphate. Further, we demonstrate that Cu transport to the mitochondrial matrix is directly  
84 responsible for the COX deficiency observed in cells lacking *SLC25A3*.

85

## 86 **Results**

### 87 *MIR1 does not transport Cu*

88 To determine if *MIR1* can transport Cu in addition to phosphate, we exploited the fact  
89 that MCF proteins insert into the cytoplasmic membrane of *L. lactis* in an active state and that Cu  
90 transport activity in this system can be detected by growth arrest in the presence of silver ( $\text{Ag}^+$ )  
91 (Fig. 1A) (11, 20). This assay was also used to assess phosphate transport by quantifying the  
92 growth rates of *L. lactis* strains expressing MCF genes in the presence of the toxic phosphate  
93 mimetic arsenate ( $\text{AsO}_4^{3-}$ ). In the presence of  $80 \mu\text{M Ag}^+$ , the growth of *L. lactis* expressing *PIC2*,  
94 but not *MIR1* or an empty vector (EV), was significantly inhibited (Fig 1B). In contrast, the growth  
95 of *L. lactis* expressing *MIR1* or *PIC2* was inhibited to the same extent when cultured in  $1.6 \text{ mM}$   
96  $\text{AsO}_4^{3-}$  relative to a control strain harboring the EV (Fig. 1C). These data show that, in *L. lactis*,  
97 *MIR1* is capable of transporting the phosphate mimetic  $\text{AsO}_4^{3-}$  but not the Cu mimetic  $\text{Ag}^+$ .

98 Consistent with our previous results (11), we find that the growth of yeast lacking *PIC2* is  
99 severely compromised on a non-fermentable carbon source in the presence of  $75 \mu\text{M Ag}^+$  (Fig.  
100 1D,E). In contrast, yeast lacking *MIR1* only exhibited a mild growth defect relative to the isogenic  
101 wild-type strain at this  $\text{Ag}^+$  concentration (Fig 1D,E). Exposure to  $125 \mu\text{M Ag}^+$  led to a growth  
102 defect in both *mir1Δ* and *pic2Δ* yeast but not in the isogenic, wild-type (WT) strain (Fig 1D). To

103 further establish that MIR1 is incapable of Cu transport activity, we quantified mitochondrial Cu  
104 levels by inductively coupled optical emission spectroscopy. Cu levels in mitochondria from *mir1Δ*  
105 yeast cells were similar to those isolated from WT cells (Fig. 1F). In yeast mitochondria, Cu is  
106 stably bound by a fluorescent, non-proteinaceous ligand (CuL) and we previously used  
107 fluorescence anisotropy to investigate the binding of this complex to PIC2 and SLC25A3 (11, 17,  
108 21). Compared to PIC2, purified MIR1 showed limited interaction with the CuL complex (Fig. 1G).  
109 Thus, while the growth assays indicate that *MIR1* deletion can produce a Cu-dependent  
110 respiration defect at high Ag<sup>+</sup> concentrations, our biochemical data suggest that MIR1 does not  
111 transport Cu. Therefore, both MIR1 and PIC2 transport phosphate but only PIC2 can transport  
112 Cu.

113

#### 114 *Mitochondrial Cu and phosphate carriers duplicated early in the evolution of eukaryotes*

115 It is not surprising that MCF proteins are present across all eukaryotes, given their  
116 fundamental roles in maintaining cellular physiology. In fact, we hypothesize that Cu transport to  
117 mitochondria was an important consideration in eukaryogenesis based on the central role of COX  
118 activity in the initial endosymbiosis (22). Conservation of this activity across diverse organisms  
119 may provide a phylogenetic signal with which to resolve residues involved in PIC2 and MIR1  
120 substrate specificities. One evolutionary hypothesis is that because ancient proteomes were  
121 smaller, transporters in these organisms were generalists that gained specificity as a  
122 consequence of gene duplication and subsequent subfunctionalization (5, 6, 23, 24).

123 To provide evolutionary context for the existing experimental data, which has nearly all  
124 been collected from mammals and yeast, we performed phylogenetic analysis on

125 PIC2/MIR1/MCF transporters from a broad range of eukaryotic lineages. We selected a set of 47  
126 taxa for analysis that spanned the supergroups within the eukaryotic Tree of Life (eToL) (25)  
127 (Dataset S1). Only taxa with complete nuclear and mitochondrial genome sequences were  
128 included to accurately enumerate gene duplications and losses and ensure that apparent losses  
129 were not due to incomplete datasets. From these genomes, a total of 2,445 putative MCF family  
130 members were identified based on the presence of a mitochondrial carrier domain (PFAM  
131 domain PF00153). To distinguish PIC2-MIR1 orthologs from other members of the MCF family,  
132 phylogenetic trees were constructed using the MCF proteins from each taxon as well as the  
133 complete set of yeast and human MCF proteins. Candidate sequences that clustered with PIC2  
134 or MIR1 were retained for further analyses (92 out of 2,445 MCF sequences).

135 Amino acid sequences of these potential Cu and/or phosphate transporting proteins were  
136 aligned and subsequently used to reconstruct the evolutionary history of PIC2-MIR1 orthologs  
137 across eukaryotes (Fig. 2). Of the 92 sequences, 47 clustered with *S. cerevisiae* PIC2 and are  
138 referred to as PIC2-like while 42 clustered with *S. cerevisiae* MIR1 and are defined as MIR1-like.  
139 The remaining three sequences were more closely related to PIC2-MIR1 than other MCFs but  
140 nonetheless fell outside of these two well supported clades.

141 To estimate the timing of gene duplications and losses within the eukaryotes, we overlaid  
142 the presence and/or absence of PIC2-like or MIR1-like sequences onto the established eToL tree  
143 (Fig. 3A). Recent phylogenomic analyses indicate that extant eukaryotes form nine supergroups  
144 (25). Species from seven of these groups were included in this analysis: Amorphea, Discoba,  
145 Archaeplastida, TSAR (Telonemids, Stramenopiles, Alveolates, and Rhizaria), Haptista, Cryptista

146 and Metamonada. Two additional groups, CRuMs (Collodictyonids, Rigifilida, and Mantamonas)  
147 and Hemimastigophora, were not included due to lack of complete nuclear genome sequences.  
148 PIC2-MIR1 orthologs were present in each taxon analyzed with the exception of those from  
149 Metamonads, which are anaerobic protists that secondarily lost mitochondria (26, 27),  
150 suggesting that the two paralogs were present within the last common eukaryotic ancestor (Fig.  
151 3A).

152         Given the ancient origin of PIC2 and MIR1, we first analyzed the presence and absence of  
153 orthologs within Amorphea, which consists of the Opisthokonts (animals, fungi and yeast),  
154 Apusomonads and Amoebae (25). MIR1-like sequences are absent from Holozoan taxa with this  
155 lineage retaining only PIC2-like transporters (Fig. 3A, B). In contrast, the fungal lineages  
156 (Holomycota) exhibit more variability in the numbers of PIC2-like and MIR1-like sequences (Fig.  
157 3B). Single orthologs of each type are present in *S. cerevisiae* and the closely related *Neurospora*  
158 *crassa*. The only Amorphea taxa that lost PIC2 are *Ustilago maydis* and *Dictyostelium discoideum*  
159 which both have a *MIR1* duplication. Outside the Amorphea, the gene copy number of the PIC2-  
160 MIR1 orthologs is more variable, which may reflect different evolutionary pressures on these  
161 transporters across lineages. Several lineages have lost either PIC2 or MIR1 and retained multiple  
162 copies of the remaining paralog (*e.g.*, PIC2-like transporters within Chloroplastida and the  
163 alveolate *Perkinsus marinus* or the MIR1 duplications in Cryptista and Stramenopile lineages; Fig.  
164 3). This raises the possibility that to compensate for the loss of the MIR1 transporter, PIC2  
165 duplicated and convergently evolved additional substrate specificities. While there may be other  
166 constraints on this evolution, the loss of a PIC2 ortholog is always accompanied by duplication of



167 the MIR1 ortholog. In contrast, a PIC2-like MCF is retained in all species that have a single PIC2-  
168 MIR1 ortholog, indicating that the loss of MIR1 does not always coincide with PIC2 duplication.

169

170 *Structural modeling of PIC2 suggests appropriate spatial organization of conserved residues that*  
171 *may coordinate Cu transport*

172 We hypothesize that specific residues in PIC2-like proteins that confer the ability to  
173 transport Cu are absent in MIR-like proteins, while amino acids conserved across PIC2- and MIR-  
174 like proteins are required for both Cu and phosphate transport. To predict residues involved in  
175 substrate specificity we modeled the PIC2 sequence onto the c-state and m-state structures of  
176 the ADP/ATP carrier (8, 9) (Supplemental Fig. 1). Sequence conservation was calculated based on  
177 Shannon entropy using alignments of the PIC2-like sequences (Fig 4A, B)(Dataset S2). By  
178 integrating the structural models and phylogenetic analyses, we were able to visualize conserved  
179 residues as a surface representation (Fig. 4C, D, E). The PIC2-like orthologs show high  
180 conservation in the channel whereas alignment with the complete PIC2-MIR1 family reveals a  
181 smaller subset of conserved residues (Supplemental Fig. 2). This analysis also detects conserved  
182 patches extending into the IMS and outside the channel in the lipid bilayer that may be required  
183 for interactions with other components of the IM (Fig 4D, E).

184 To identify residues for Cu transport, we initially focused on the well-established Cu-  
185 binding ligands Cys, His and Met. Analysis of the PIC2-MIR1 ortholog trees showed that histidine  
186 33 (His33) (using the PIC2 numbering) is conserved in both the PIC2 and MIR1 clades (Fig. 5).  
187 Cysteine 29 is conserved in the PIC2 clade and most MIR1s but is replaced with Ala in the MIR1-  
188 like transporters from lineages with multiple duplications (*Emiliana huxleyi*, *Thalassiosira*

189 *psuedonana*, and *Phaeodactylum tricornutum*). Cysteine 21 and Cys225 are strictly conserved  
190 among PIC2 orthologs, but not among MIR1 orthologs (Fig. 5). Cysteine 44 is conserved in the  
191 PIC2-like clade while MIR1-like orthologs have a conserved threonine in the equivalent position  
192 (Fig. 5). The PIC2-like transporters that lack Cys44 are the *P. marinus* duplications, one of two  
193 copies of PIC2 in *P. tricornutum* and the single copy of PIC2 in *N. crassa*. Analysis of the structural  
194 models revealed that Cys21, Cys29, Cys44 and His33 are positioned along one side of the channel  
195 (Supplemental Fig. 1) whereas Cys225 is on the opposite side of the channel. Cysteine 225 is  
196 positioned to interact with the peptide backbone of Cys182 (based on the alignments this residue  
197 is only a cysteine in *S. cerevisiae*), which faces away from the channel. Together, these data  
198 suggest that Cys21, Cys29, Cys44 and His33 may combine to form transient sites that bind Cu  
199 directly as it moves through the IM.

200

#### 201 *Mutating structural elements and conserved contact points cause differential transport defects*

202 To assess the functional importance of the Cys-His residues in Cu and/or phosphate  
203 transport we expressed PIC2 mutants in *L. lactis*. To assay Cu transport, we cultured each variant  
204 in media containing an Ag<sup>+</sup> concentration that inhibited growth of *L. lactis* expressing wild-type  
205 PIC2 but not of cells harboring an empty vector (EV; Fig. 1A, Fig. 6). *L. lactis* expressing C21A,  
206 C29A, H33A, C44A and C225A PIC2 mutants displayed increased Ag<sup>+</sup> resistance relative to *L. lactis*  
207 expressing wild-type PIC2 (all  $P < 0.012$ ) (Fig. 6A), with the most resistance observed in the H33A  
208 mutant. However, these mutants also exhibited a growth defect relative to cells with an EV,  
209 suggesting that although transport is reduced residual activity is nonetheless present. Similarly,  
210 when Ag<sup>+</sup> was replaced with AsO<sub>4</sub><sup>3-</sup> to assess phosphate transport, *L. lactis* expressing each of the

211 five PIC2 mutants displayed increased resistance to  $\text{AsO}_4^{3-}$  (Fig. 6B) suggesting that these  
212 mutations also limit its transport.

213 Computational analyses predict that *S. cerevisiae* MCF transporters have three contact  
214 sites for substrate binding (3). In PIC2, the proposed phosphate substrate contact points are  
215 Gln86 and Lys90 in transmembrane helix (TMH) 2, Gln176 in TMH4 and Met275 in TMH6 (Fig. 4)  
216 (3, 4, 8). These residues are largely conserved in both the PIC2-like and MIR1-like clades (Fig. 5),  
217 as is expected for transporters that share a substrate. We mutated each of these residues to  
218 alanine and assessed transport activity as described above. When expressed in *L. lactis*, the  
219 Gln86Ala and Gln176Ala mutants were more resistant to  $\text{Ag}^+$  than wild-type PIC2 (Fig. 6A) but  
220 less resistant than cells expressing EV. In contrast, the Lys90Ala and Met275Ala mutants  
221 exhibited comparable  $\text{Ag}^+$  sensitivity to wild-type PIC2 ( $p > 0.05$ ), suggesting that these  
222 substitutions do not affect Cu transport (Fig. 6A). The addition of  $\text{AsO}_4^{3-}$  to the media only  
223 inhibited the growth of cells expressing wild-type PIC2; cells expressing Gln86Ala, Lys90Ala,  
224 Gln176Ala and Met275Ala all grew at similar rates as cells expressing the EV (Fig. 6B).

225 Finally, we interrogated the functional significance of a subset of residues that were  
226 selected based on sequence conservation and our structural model; Gln47, Val48, Asp124,  
227 Leu127 and Gly268 (Fig. 4A, Supplemental Fig. 1). With very few exceptions, Gln47 is conserved  
228 among eukaryotic PIC2-MIR1 orthologs (Fig 4A, B and Fig. 5). Val48 it is part of a group of residues  
229 that appear to close the channel in the c-state (Supplemental Fig. 1). Asp124 interacts with  
230 Gln176 (Supplemental Fig. 1) and is conserved amongst all PIC2-like orthologs and those  
231 transporters most closely related to yeast MIR1 (Fig. 5). Leu127 is conserved in all orthologs and  
232 interacts with Gln86 (Fig 4A, B, Fig. 5, Supplemental Fig. 1). Gly268 is almost invariant throughout

233 the evolution of this protein family (Fig 4A, Fig. 5). The Gln47Ala, Val48Ala and Asp124Ala PIC2  
234 mutants expressed in *L. lactis* were more resistant to Ag<sup>+</sup> than wild-type PIC2 (Fig. 6A) but less  
235 resistant than cells expressing EV, suggesting they also harbored residual Cu transport activity.  
236 When expressed in *L. lactis*, the Leu127Ala PIC2 variant showed equivalent susceptibility to Ag<sup>+</sup>  
237 as the wild-type PIC2 but was resistant to AsO<sub>4</sub><sup>3-</sup> (Fig. 6A, B) indicating that this single substitution  
238 interferes with phosphate transport but does not prevent Cu transport. Substituting alanine for  
239 valine at position 48 resulted in a significant difference in Ag<sup>+</sup> resistance but mildly altered AsO<sub>4</sub><sup>3-</sup>  
240 resistance (Fig. 6A, B). Finally, expression of the Gly268Ala variant resulted in resistance to Ag<sup>+</sup>  
241 and AsO<sub>4</sub><sup>3-</sup>, suggesting that this mutation disrupts the ability to transport both substrates (Fig.  
242 6A, B). We also tested a series of mutants that exchanged the residues found in yeast PIC2 and  
243 mammalian SLC25A3 with those found in MIR1. Conversion of the PIC2 residues Ser102, Tyr156,  
244 Thr180, Gln138, Glu242 and Val191 to the equivalent residues in MIR1 did not affect the ability  
245 to transport Ag<sup>+</sup> (Supplemental Fig. 3). Collectively, the data from the *L. lactis* assays show we  
246 can mutate individual residues that impair the transport of either Cu or phosphate or both.

247

#### 248 *Mitochondrial Cu transport is compromised in a Leu175 mutant of SLC25A3*

249 Based on the His33 and Leu127 PIC2 mutant data from *L. lactis*, we investigated the  
250 transport activity of the equivalent variants in murine SLC25A3 (His75 and Leu175). Consistent  
251 with the failure of the His33Ala PIC2 mutant to transport Ag<sup>+</sup> or AsO<sub>4</sub><sup>3-</sup> in *L. lactis*, expression of  
252 the equivalent His75Ala SLC25A3 variant in immortalized mouse embryonic fibroblasts (MEFs)  
253 with floxed (WT) or collapsed (KO) *Slc25a3* alleles did not rescue the COX deficiency of the KO  
254 cells (Fig. 7A, B). Conversely, expression of the Leu175Ala SLC25A3 variant was able to reverse

255 the COX defect (Fig. 7B). Immunoblot analysis showed that the Leu175Ala mutant was present in  
256 mitochondria and increased steady-state COX1 levels (Fig. 7C). Consistent with our previous  
257 studies using a mitochondrially-targeted Cu sensor (17, 28), we found that total mitochondrial  
258 Cu content was significantly reduced in KO MEFs and increased in KO MEFs expressing the  
259 Leu175Ala variant (Fig. 7D).

260 Reconstitution of MCF proteins in liposomes has been used extensively to assess  
261 substrate transport and specificity (14, 29-33). Liposomes created from mitochondrial  
262 membranes of WT but not KO MEFs were able to transport Cu (Fig 7E). The Cu transport defect  
263 in KO-derived liposomes was reversed upon expression of the Leu175Ala variant (Fig 7E). To  
264 assess phosphate uptake, mitochondrial swelling in the presence of phosphate was measured  
265 (12, 18). Intact mitochondria isolated from KO cells had a phosphate uptake defect compared to  
266 WT that was rescued by expressing WT SLC25A3 but not the Leu175Ala variant (Fig. 7F). Taken  
267 together, these data show that the Leu175Ala mutant is able to transport Cu but not phosphate  
268 in mitochondria and that this Cu transport activity is sufficient to rescue COX activity.

269

## 270 **Discussion**

271 The mechanisms that mediate MCF transporter specificity remain largely unknown. While  
272 individual studies have investigated deficiencies in the transport of one substrate, few have  
273 assessed substrate promiscuity. Here, we directly addressed this issue by focusing on Cu and  
274 phosphate transport which, in mammals, is mediated by the single MCF transporter SLC25A3.  
275 Multiple studies clearly connect SLC25A3 to phosphate transport and mutations in *SLC25A3* lead  
276 to skeletal muscle myopathy and heart disease in humans (17, 18, 34-37) and cardiac

277 hypertrophy in mice (18). *Slc25a3* knockout MEFs derived from the heart-specific *Slc25a3*  
278 knockout mouse exhibit clear COX and SOD1 defects that can be rescued by overexpression of a  
279 *Slc25a3* cDNA or addition of Cu (17). These data are complemented by *in vitro* Cu transport by  
280 purified SLC25A3 in liposomes and by Ag<sup>+</sup> growth phenotypes associated with its expression in *L.*  
281 *lactis* (17). The data presented in this study provide the first experimental evidence of a missense  
282 mutation that separates Cu and phosphate transport, and firmly establish that physiological  
283 defects in COX and SOD1 are due to Cu transport and not secondary effects resulting from  
284 decreased phosphate transport.

285

#### 286 *Evolutionary history of mitochondrial Cu-phosphate transporters*

287 Our evolutionary analyses of the Cu-phosphate transporters were prompted by the  
288 observation that *S. cerevisiae* PIC2 and MIR1 exhibit substrate specificity, whereas the  
289 mammalian ortholog SLC25A3 is responsible for the transport of both Cu and phosphate.  
290 Selection on genes with multiple functions can constrain diversity to avoid negative effects  
291 associated with losing one of these functions. Therefore, gene duplications serve as important  
292 sources for evolutionary selection and refinement. Resulting duplications can be retained for the  
293 original function, specialized for new functions, refined to enhance an existing function or allow  
294 for increased expression by gene dosage; if none of these occur, the duplicate gene is lost (38-  
295 44). In *S. cerevisiae*, PIC2 and MIR1 are partially redundant for phosphate transport (12).  
296 However, mutation of *MIR1* in *S. cerevisiae* is sufficient to produce phosphate-related  
297 phenotypes suggesting that, under most conditions, the ability of PIC2 to transport phosphate is  
298 unable to compensate for loss of MIR1 function (12, 17). Instead, the *PIC2* sequence appears to

299 be optimized for Cu transport. Similarly, we show here that *MIR1* lacks clear Cu transport activity  
300 even though *mir1Δ* yeast exhibit increased susceptibility to Cu restriction compared to WT cells.  
301 Our phylogenetic analyses of *PIC2* and *MIR1* sequences suggest that the gene duplication that  
302 created these two orthologs was an ancient event, and that evolutionary interplay between these  
303 two substrate specificities may have occurred multiple times throughout eukaryotic evolution.

304 The loss of *MIR1* has occurred multiple times in eukaryotes, an event that is likely  
305 facilitated by the dual specificity of *PIC2*. *SLC25A3* is essential in mammals as the homozygous  
306 deletion is embryonic lethal. While mammals do express two *SLC25A3* isoforms, isoform A is  
307 expressed primarily in heart and skeletal muscle whereas isoform B is expressed in all tissues (14,  
308 18, 34). Therefore, it is unlikely that the isoforms provide the functional redundancy that would  
309 be afforded via gene duplication or retention of *MIR1*.

310

### 311 *Understanding Cu transport*

312 The Leu175Ala mutation in *SLC25A3* that separated Cu and phosphate transport fully  
313 restores COX activity and mitochondrial Cu levels without rescuing phosphate transport. This  
314 finding confirms that the COX defect in mutant cells is due to defective Cu transport, rather than  
315 reduced phosphate levels. Further, our data suggest that compromising the phosphate transport  
316 function of *PIC2* is easier than inactivating its Cu transport function. Mutations in a series of  
317 cysteine and histidine residues lining the channel of the c-state model decrease, but do not  
318 eliminate, Cu transport. The *PIC2* structural model indicates that the Cys29 and His33 would be  
319 the most likely location to form a Cu-binding site. The cysteine positioned above that site (residue  
320 21) may help recruit Cu from the IMS and present it to Cys29-His33. In the m-state model, the

321 Cys29-His33 proximity is maintained and the next potential ligand, Cys44, is exposed allowing for  
322 potential relocation of the Cu. PIC2 is able to transport Cu supplied in multiple forms, including a  
323 ligated form known as CuL that is present in the mitochondrial matrix (11). The CuL complex is  
324 negatively charged, suggesting that positively charged or hydrogen-bond donor residues within  
325 the channel may stabilize this interaction, including those that participate in phosphate transport  
326 (Gln86 and Lys90) (45). Additionally, 1D and 2D heteronuclear NMR analysis of the purified CuL  
327 shows the presence of a substituted benzene ring structure consistent with its fluorescent  
328 properties (Supplemental Fig. 4). In the m-state, the aromatic ring of the side chain of Tyr83  
329 comes between the cysteine and histidine. This structure could mimic a CuL-bound state (from  
330 the c-state) and the movement of the side chain could facilitate the release of the complex from  
331 the Cys29-His33 site towards the matrix (Supplemental Fig. 4). The spatial arrangement of these  
332 residues may allow for either CuL binding and subsequent release of Cu or facilitate transport of  
333 the intact CuL complex. The intact transport may be expected as this is the major form of Cu in  
334 mitochondria under normal conditions. In addition, the anionic nature of the CuL complex may  
335 explain some of the promiscuity between Cu and phosphate as substrates of the same carrier.

336 Our phylogenetic analysis revealed nine taxa that lack a PIC2-like ortholog yet have COX.  
337 Each of these taxa have multiple *MIR1*-like transporters (*Guillardia theta*, *Thalassiosira*  
338 *pseudonana*, *Emiliana huxleyi*, *Dictyostelium discoideum*, *Ustilago maydis*, *Cyanidioschyzon*  
339 *merolae*, *Chrysochromulina tobinii*, *Micromonas commoda*, and *Naegleria gruberi*). Alignment of  
340 these paralogs identified residues that are present in at least one of the duplicates and are shared  
341 with PIC2 (Fig. 5 and Supplemental Fig. 5). This analysis may highlight the variants that have  
342 allowed *MIR1* to secondarily gain Cu transport activity. One consistent difference is a histidine



343 found in PIC2 orthologs versus a glutamine found in MIR1 orthologs at position 230 (numbering  
344 for PIC2). Both of these side chains stabilize the conformation of a possible cardiolipin binding  
345 site, by hydrogen bonding to peptide carbonyl oxygens. Additional experiments will be required  
346 to determine if this substitution affects substrate selectivity.

347 In the taxa with multiple MIR1-like paralogs that lack PIC2-like transporters (*i.e.*, *E.*  
348 *huxleyi*, *G. theta* and *U. maydis*), we also observe multiple changes in the residues studied here  
349 (Supplemental Fig 5). We favor a hypothesis in which *MIR1* duplication is a response to overcome  
350 the loss of PIC2. However, this requires further investigation and an acknowledgement that other  
351 MCF transporters may have also acquired Cu transport activity. Indeed, in yeast we have shown  
352 that the MCF family member MRS3 serves as a secondary importer of mitochondrial Cu (21).  
353 MRS3 is known as an iron transporter, but transport of Cu by MRS3 and its orthologs has been  
354 reported in studies using mitochondrially derived vesicles from yeast and plants and in a  
355 reconstituted assay system (46-49). We did not compare the presence or absence of MRS3  
356 orthologs in these taxa.

357

### 358 *Understanding phosphate transport*

359 Our biochemical data suggest that Lys90 and Leu127 are important for phosphate  
360 transport but dispensable for Cu transport in *L. lactis*. The proposed mechanism of transport for  
361 MCF based on the comparison of the c- and m-states of the ADP-ATP carrier suggests that even-  
362 numbered helices shift to allow transport/transition to the opposite state (4, 8). The PIC2  
363 structural model shows that Leu127 is on helix 3 adjacent to a proline that kinks helix 3, thereby  
364 altering helix-helix packing interactions with helix 2 (Fig. 8). The Leu127 side chain interacts with

365 the peptide backbone between Leu85 (Met in SLC25A3) and Gln86, a “knobs into holes”  
366 interaction. We hypothesize that helix 2 reorients in the alanine substitution mutant to have  
367 stronger van der Waals contact, especially in the vicinity of Gln86. In the c-state, this change  
368 could shift the side chains of Gln86 and Lys90 to a conformation that disrupts a phosphate  
369 binding site (Fig. 8).

370 Cu transport requires the formation of transient covalent bonds between the metal and  
371 ligands during transport, whereas phosphate transport relies on hydrogen bonding and salt  
372 bridges. These requirements may account for the fact that multiple mutations were able to  
373 inhibit the ability of PIC2 to transport phosphate. Other site-directed mutational studies of MIR1  
374 have identified multiple residues that are required for phosphate transport (50-54), including  
375 His33, Thr44 and Lys90 (using PIC2 numbering). Consistent with these earlier studies, we observe  
376 decreased phosphate transport when mutating the corresponding residues in PIC2. In fact,  
377 previous studies of MIR1 function showed that mutation of Thr44 to cysteine partially inactivated  
378 phosphate transport (54). This cysteine/threonine is clearly demarcated at the node between  
379 PIC2 and MIR1 clades, suggesting that it may be a critical change that weakened, but did not  
380 eliminate, phosphate transport in PIC2-like transporters (Fig. 5). Three lineages (*O. sativa*, *S.*  
381 *punctatus* and *P. marinus*) lack MIR1-like transporters and have multiple PIC2-like transporters.  
382 In the case of rice, this could simply be due to the polyploid nature of its genome. In the chytrid  
383 *S. punctatus*, it could suggest that duplication enhances gene dosage. That is, additional copies  
384 compensate for less efficient phosphate transport. In contrast, the duplicated genes in *P. marinus*  
385 have undergone several notable changes; one variant has a large carboxy terminal truncation, 3  
386 of the 4 variants have valine replacing cysteine at position 44 (as noted above from previous

387 studies threonine at this position is optimal for phosphate transport) and histidine at position  
388 230 is replaced by the glutamine that is found in more phosphate-selective transporters. These  
389 changes and gene dosage may be sufficient to overcome the loss of a MIR1-like transporter.  
390 Testing these hypotheses will require *in vitro* expression of multiple transporters to assess  
391 substrate selection.

392

### 393 *Conclusions*

394 Mitochondria function as a metabolic hub that controls physiology and disease by  
395 balancing the concentrations of multiple metabolites and essential elements (10, 55). The MCF  
396 proteins are a critical piece in regulating the import and export of these substrates (1, 2) and have  
397 been duplicated and specialized over evolutionary time to selectively recognize and transport  
398 highly similar substrates. However, gene duplication has allowed for the retention of some  
399 carriers with multiple substrates. The evolutionary relationships among these carriers reveal  
400 aspects of transport mechanisms and the physiological demands of the organism. Our analysis of  
401 the Cu-phosphate MCF transporters shows that organisms deploy multiple strategies to recruit  
402 these substrates. We cannot determine a single characteristic that indicates an advantage or  
403 disadvantage of either strategy, as unique patterns appear nested in different lineages. Metal  
404 transport to the mitochondrial matrix is required for Fe-S cluster assembly and COX assembly.  
405 Perhaps metal substrates are sufficiently simple that multiple MCFs are capable of transport.  
406 However, given the fatal disorders that result from too much or too little Cu or iron it is unlikely  
407 that their transport is left to chance (56). Cu storage in the mitochondrial matrix may have  
408 evolved as a mechanism to ensure Cu availability for COX assembly in an early endosymbiont that

409 was subsequently retained during eukaryogenesis (22). Additional roles for Cu in the matrix  
410 remain to be determined. The recent discoveries that mitochondrial Cu can induce cell death  
411 through a pathway coined cuproptosis (57), disrupt essential processes such as Fe-S assembly  
412 (58, 59) and alter the stability of SOD1 in the cytosol (17) collectively suggest that understanding  
413 the physiological consequences of disrupting this Cu pool and its homeostasis remains an  
414 important area of future research.

## 415 **Methods**

### 416 *Phylogenetic analysis*

417 To delineate the evolutionary histories of the PIC2/MIR1 orthologs, 47 species were  
418 chosen that span the eukaryotic supergroups defined here. For each of these species, complete  
419 nuclear genome assemblies and protein predictions are available from NCBI (Supplemental Table  
420 1). MCF orthologs were identified using HMMER (60) to detect sequences containing the  
421 Mitochondrial Carrier (MC) domain (PFAM PF00153). Redundant sequences and transcript  
422 variants were eliminated using CD-Hit with a threshold of 0.9 (61).

423 To distinguish PIC2/MIR1 orthologs from other members of the MCF family, phylogenetic  
424 trees were built using the MC domain-containing proteins from each organism as well as the  
425 complete set of MCF proteins from *Homo sapiens* and *Saccharomyces cerevisiae*. Amino acid  
426 sequences were aligned in MEGA X (62) using ClustalW with default parameters. Neighbor-  
427 joining trees were generated using a Poisson substitution model, uniform substitution rates  
428 among sites, and pairwise gap deletion. Support values were determined using 1,000 bootstrap  
429 replicates.

430 Amino acid sequences of the eukaryotic MIR1/PIC2 orthologs were aligned with 32 *S.*  
431 *cerevisiae* MCF proteins using MUSCLE implemented in MEGA X. Phylogenetic analysis was  
432 performed using IQ-TREE version 2.0.3 (63). The optimal substitution model was selected using  
433 the IQ-TREE ModelFinder (64). A maximum likelihood tree was constructed using the LG+F+R7  
434 model (a general codon exchange matrix for nuclear genes with amino acid frequencies  
435 determined empirically from the data and 7 rate categories). Support was calculated based on  
436 1,000 replications using ultrafast bootstrap approximation (UFBoot2;(65)).

437 *Structural modelling*

438           Sequence alignments between Pic2 and the ADP/ATP exchanger were used correctly  
439 place indels and ensure proper alignment of the key helices. Initial molecular models were  
440 generated using Swissmodel and subjected to careful analysis in Coot for side chain rotamer  
441 optimization, interatomic clashes and hydrogen bonding (66). Finally, the model atomic  
442 coordinates were energy minimized within the PHENIX suite (67). We modeled Pic2 based on  
443 the m-state and the c-state of the ADP/ATP exchangers deposited in the protein data bank  
444 (PDB:4C9G and PDB: 6GCI).

445

446 *Expression in Lactococcus lactis*

447           *L. lactis* cells transformed with vector (pNZ8148 (MoBiTec)) alone or pNZ8148 carrying  
448 yeast MIR1, PIC2 or site directed PIC2 mutants were grown overnight at 30°C in M17 medium  
449 with 0.5% glucose and 10 µg/mL chloramphenicol. To determine Ag<sup>+</sup> toxicity in *L. lactis* strains  
450 containing vector, MIR1, PIC2 or PIC2 mutants, cells were grown in a 96-well plate containing  
451 M17 medium plus 1 ng/mL nisin and increasing concentrations of Ag<sup>+</sup> (0-250 µM) or AsO<sub>4</sub><sup>3-</sup> (0-  
452 2.5mM). Controls containing M17 without nisin or M17 plus Ag<sup>+</sup> or AsO<sub>4</sub><sup>3-</sup> without nisin were  
453 included. Optical density at 600 nm was used to assess growth after 24 hours. Percent growth  
454 was quantified by comparing to the optical density of the same genotype in nisin alone.

455

456 *Elemental analysis*

457           Samples were digested in 40% nitric acid by boiling for 1 hour in capped, acid washed  
458 tubes, diluted in ultra-pure, metal free water and analyzed by ICP-OES (Perkin Elmer, Optima

459 7300DV) versus acid washed blanks. Concentrations were determined from a standard curve  
460 constructed with serial dilutions of two commercially available mixed metal standards (Optima).  
461 Blanks of nitric acid with and without “metal-spikes” were analyzed to ensure reproducibility.

462

#### 463 *Cell culture conditions*

464 Clonal Slc25a3<sup>FLOX/FLOX</sup> and Slc25a3<sup>-/-</sup> MEF lines were then isolated and maintained in high  
465 glucose DMEM containing sodium pyruvate, 50 µg/ml uridine, 0.1mM mercaptoethanol and 15%  
466 fetal bovine serum at 37oC at an atmosphere of 5% CO<sub>2</sub> (17). Mouse Slc25a3-b cDNA was  
467 amplified from RNA and cloned into a Gateway-modified retroviral expression vector. The fidelity  
468 of this construct was confirmed by sequencing and retrovirus was produced with the Phoenix  
469 Amphotrophic packaging cell line and used to transduce MEFs.

470

#### 471 *Immunoblot and activity assays*

472 This study used monoclonal antibodies raised against TOM40 (ProteinTech 18409-1-AP),  
473 and COX1 (Abcam ab14734), and a rabbit polyclonal antibody raised against the KLH conjugated  
474 SLC25A3 peptide CRMQVDPQKYKGIFNGSVTLKED (Pacific Immunology). COX activity was  
475 determined by monitoring the decrease in absorbance at 550 nm of chemically reduced  
476 cytochrome *c* in the presence of whole cell or mitochondrial extracts (65). All activities were  
477 normalized to protein concentration then converted to percentage of maximum control value.

478 **Acknowledgements**

479           We thank Ann Ashton, Shannon Baseke, Shelley Brannon, LaQuasha Jones, Kacie Oglesby,  
480 Christina Waples, Mary Wetzel (Auburn University undergraduate research students) for  
481 contributing to construction and initial testing of the different mutants in this study. This work  
482 is supported by a grant from National Institutes of Health [R01GM120211 to PAC and SCL]. PAC  
483 is supported by the Alabama Agricultural Experiment Station. KMB is supported by a grant from  
484 National Science Foundation [EF 2021886].



485 **Figures and Figure legends**

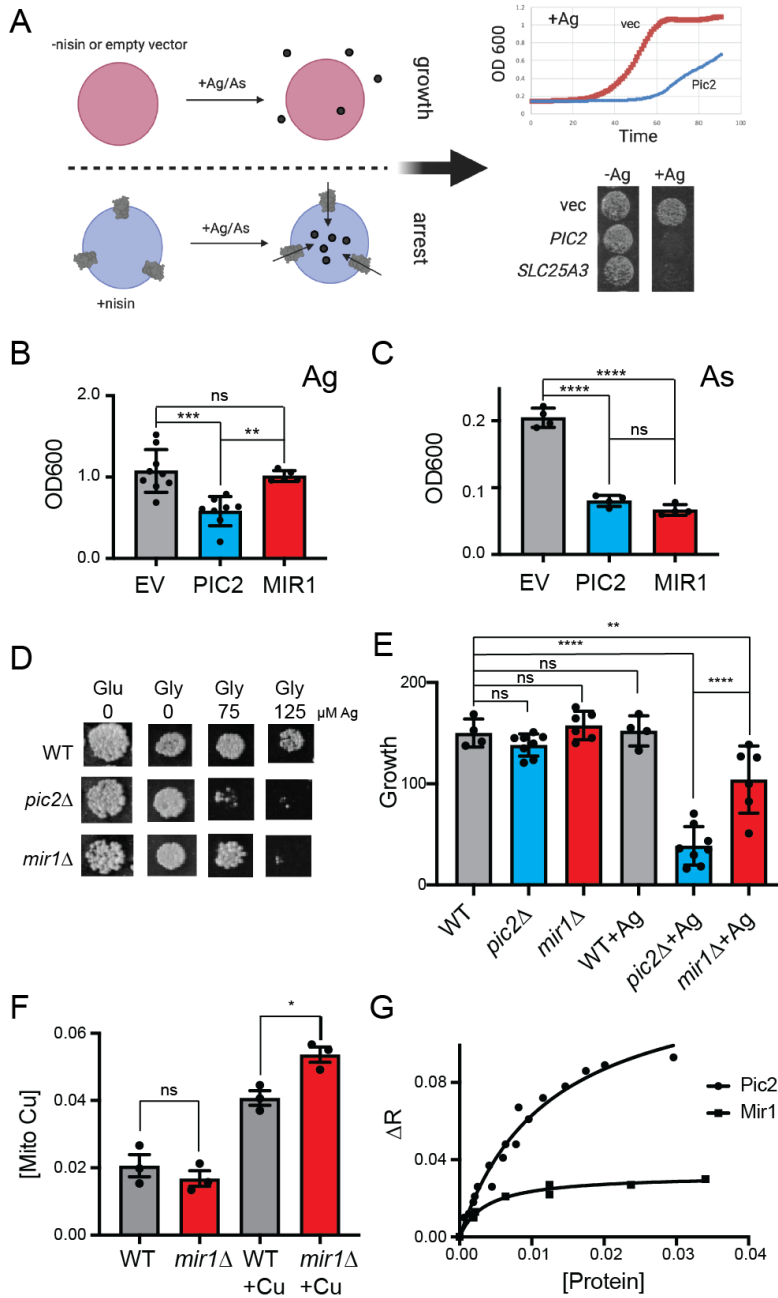

486

487 **Figure 1: *S. cerevisiae* MIR1 does not transport Cu.** A) Schematic representation of the *L. lactis*  
 488 expression system used to quantify transport characteristics. Survival is determined by the  
 489 growth rate in liquid culture or by visual inspection of cells grown on agar plates containing Ag<sup>+</sup>  
 490 or AsO<sub>4</sub><sup>3-</sup> in the presence of the inducer nisin. B) Quantification of the growth of *L. lactis*  
 491 expressing empty vector (EV), *S. cerevisiae* PIC2 or *S. cerevisiae* MIR1 after 12 hours in 80 μM Ag<sup>+</sup>  
 492 containing media (n>5). C) Quantification of the growth of *L. lactis* expressing EV, PIC2 or MIR1

493 after 12 hours in 1.6 mM  $\text{AsO}_4^{3-}$  containing media (n=5). *D*) Wild-type (WT), *pic2Δ* or *mir1Δ* yeast  
494 grown in rich medium with a fermentable (Glu: glucose) or a non-fermentable (Glycerol: Gly)  
495 carbon source in the absence (0) or presence of  $\text{Ag}^+$  (75 or 125  $\mu\text{M}$ ). All strains were spotted on  
496 media as a  $10^{-3}$  dilution of  $\text{OD}_{600}$  of 1. *E*) Densitometry measurements of serial dilutions ( $10^1$ ,  $10^2$ ,  
497  $10^3$ ,  $10^4$ ) of cells in *D*) on Glu, Gly and Gly plus 75 $\mu\text{M}$  Ag (WT n=4, *pic2Δ* n=8, *mir1Δ* n=6). *F*) Cu  
498 content of purified intact mitochondria from *mir1Δ* cells assayed by ICP-OES and compared with  
499 that of parental WT cells. Both strains were grown in YP medium with glucose as a carbon source  
500 containing 10  $\mu\text{M}$  BCS or 100  $\mu\text{M}$  Cu (+Cu) (n=3). *G*) Fluorescence anisotropy (FA) of CuL (Ex320,  
501 Em400) upon the addition of reconstituted PIC2 or MIR1 in proteoliposomes prepared from  
502 extracted egg-yolk lipids. Control FA of equal quantity of lipids without protein added was  
503 subtracted from each data point. Protein concentrations were determined by Bradford assay,  
504 and curves are fit with a nonlinear regression that assumes a single binding site. In all panels,  
505 data are plotted as the mean  $\pm$  standard deviation and a one-way ANOVA was used for statistical  
506 analysis; ns- not statistically significant, \*  $P < 0.05$ , \*\*  $P < 0.01$ , \*\*\*  $P < 0.001$ , \*\*\*\*  $P < 0.0001$ .

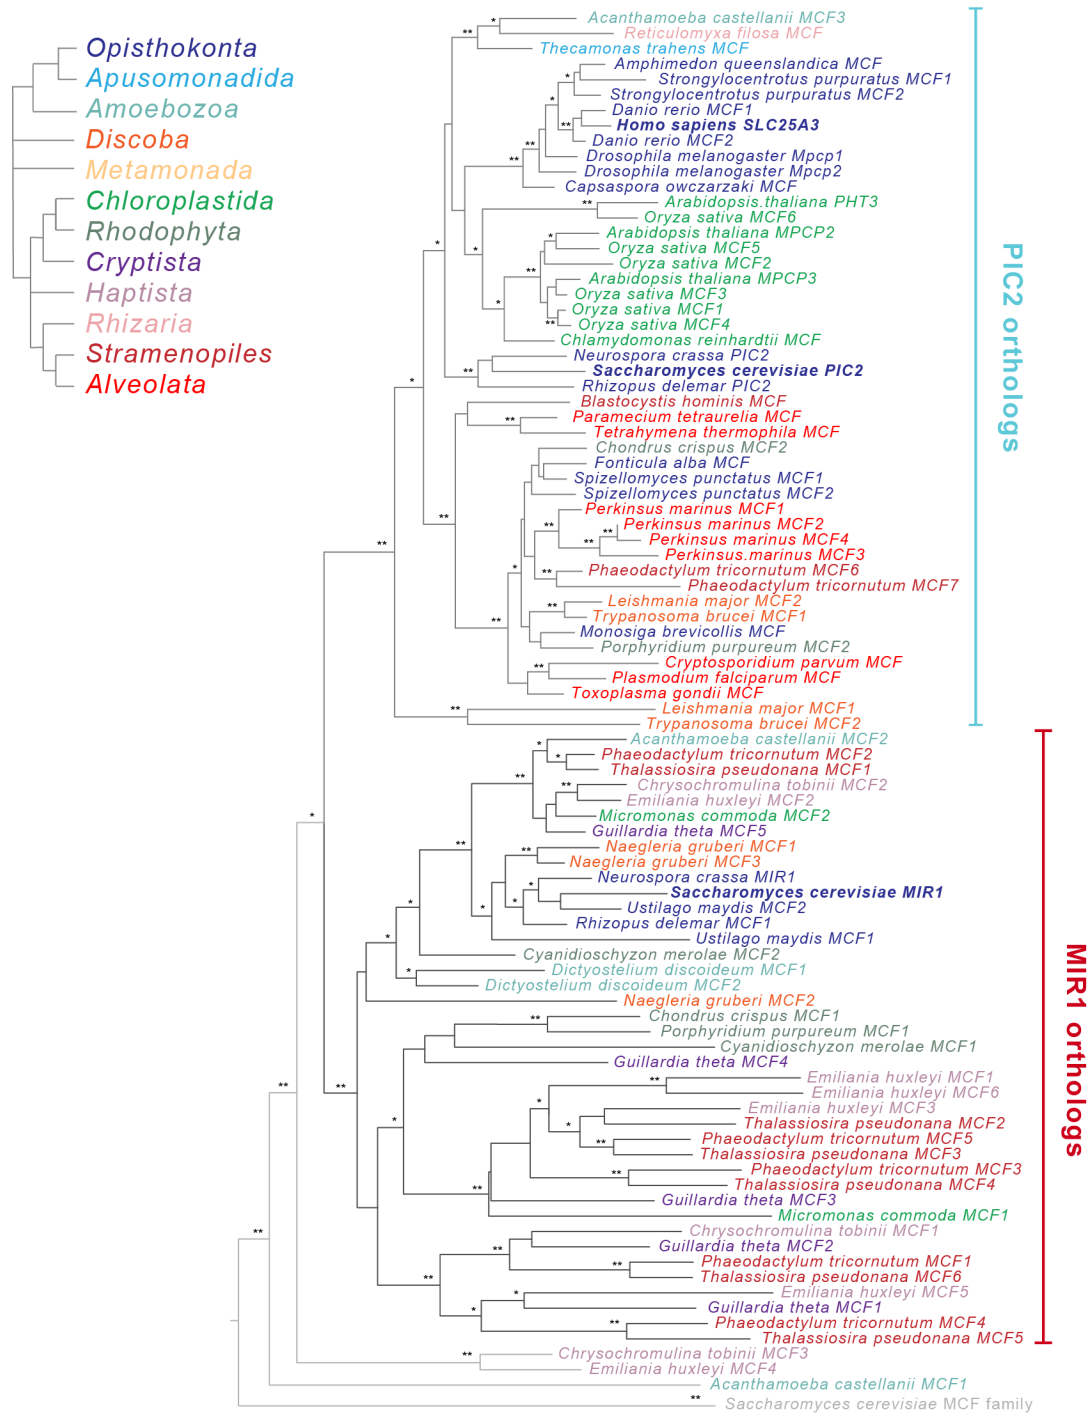

507

508 **Figure 2. Phylogenetic analysis of the PIC2/MIR1 orthologs from 47 taxa reveals two major**  
 509 **clades.** Amino acid sequences of the eukaryotic MIR1/PIC2/SLC25A3 orthologs were aligned with  
 510 the complete set of MCF proteins from *S. cerevisiae*. The maximum-likelihood tree shown was  
 511 constructed in iQ-TREE using a general codon exchange matrix for nuclear genes with amino acid  
 512 frequencies determined empirically from the data and seven rate categories (LG+F+R7). Support  
 513 for the nodes was calculated using 1,000 replications and is indicated as follows: \*\* >95%; \*  
 514 >75%. Taxa names for the MIR1/PIC2/SLC25A3 sequences are color-coded according to the eToL

515 supergroups as indicated; the *S. cerevisiae* MCF outgroup sequences (grey) have been collapsed  
516 to a single branch. Accession numbers for each of the sequences is available in Supplemental  
517 Dataset S1.

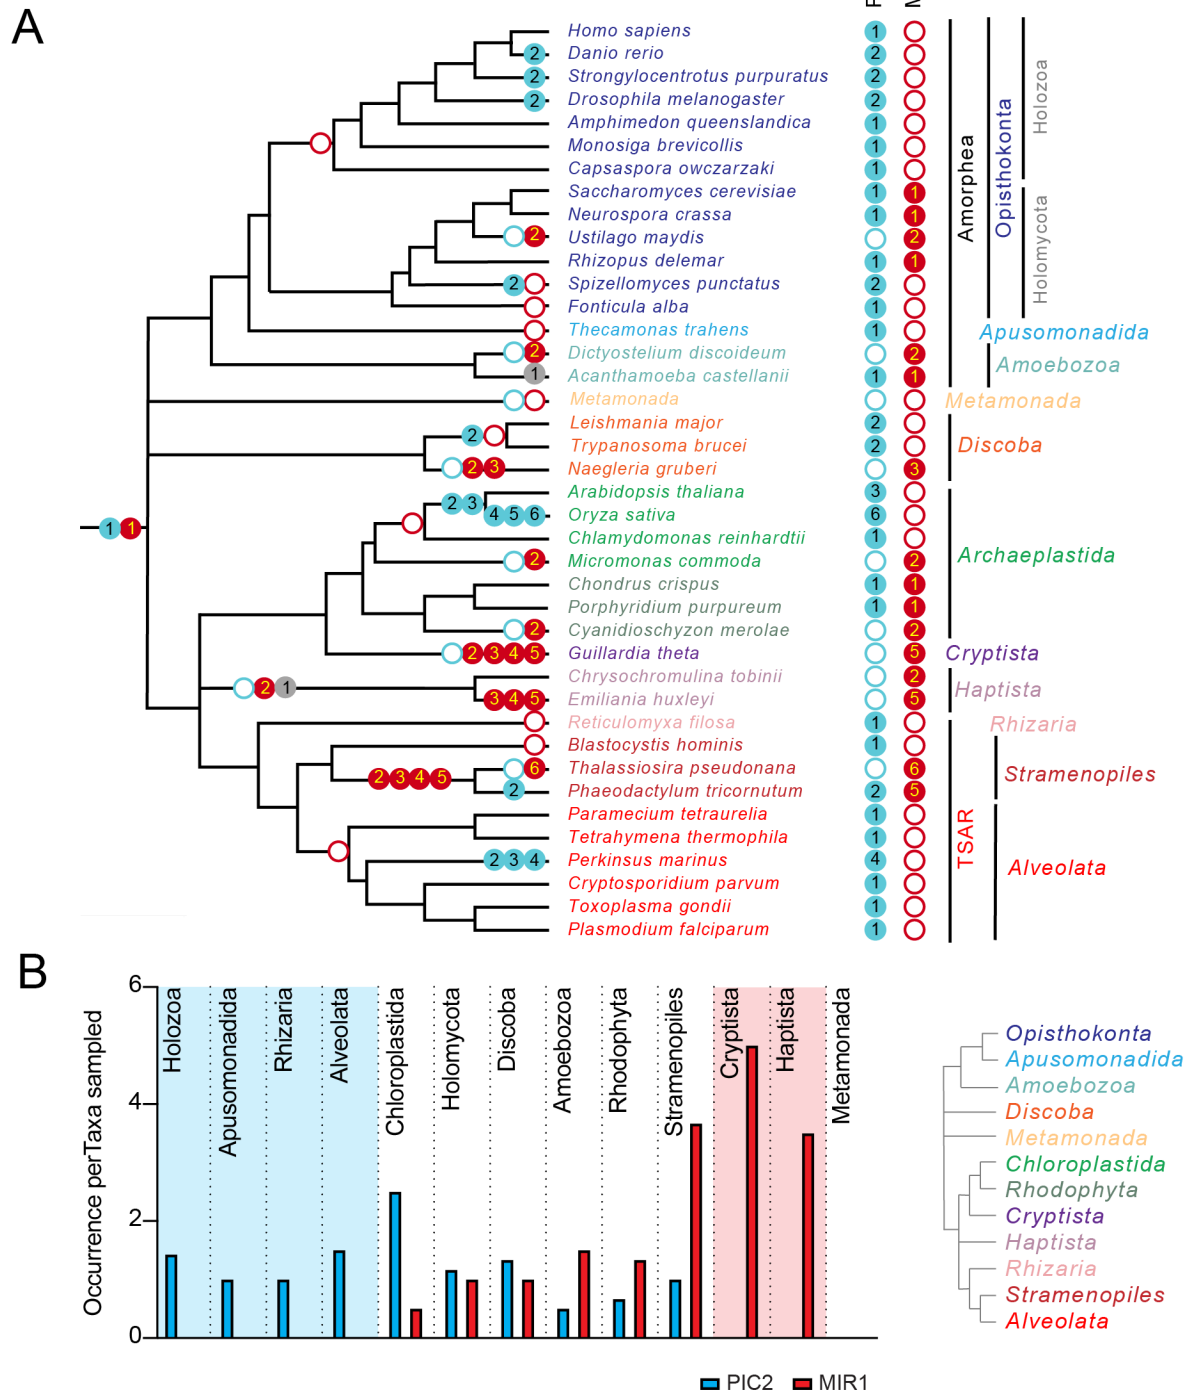

518  
 519 **Figure 3. The PIC2/MIR1 family of MCF transporters is ancient within eukaryotes.** A) Using the  
 520 presence or absence of orthologs within the eukaryotic lineages, we inferred the evolutionary  
 521 timings of gene duplications (solid circles) and losses (hollow circles) of the PIC2-like (blue), MIR1-  
 522 like (red) and other (grey) sequences. B) The average number of PIC2 and MIR1 orthologs  
 523 identified in the sampled taxa from eight of the nine eukaryotic supergroups.  
 524

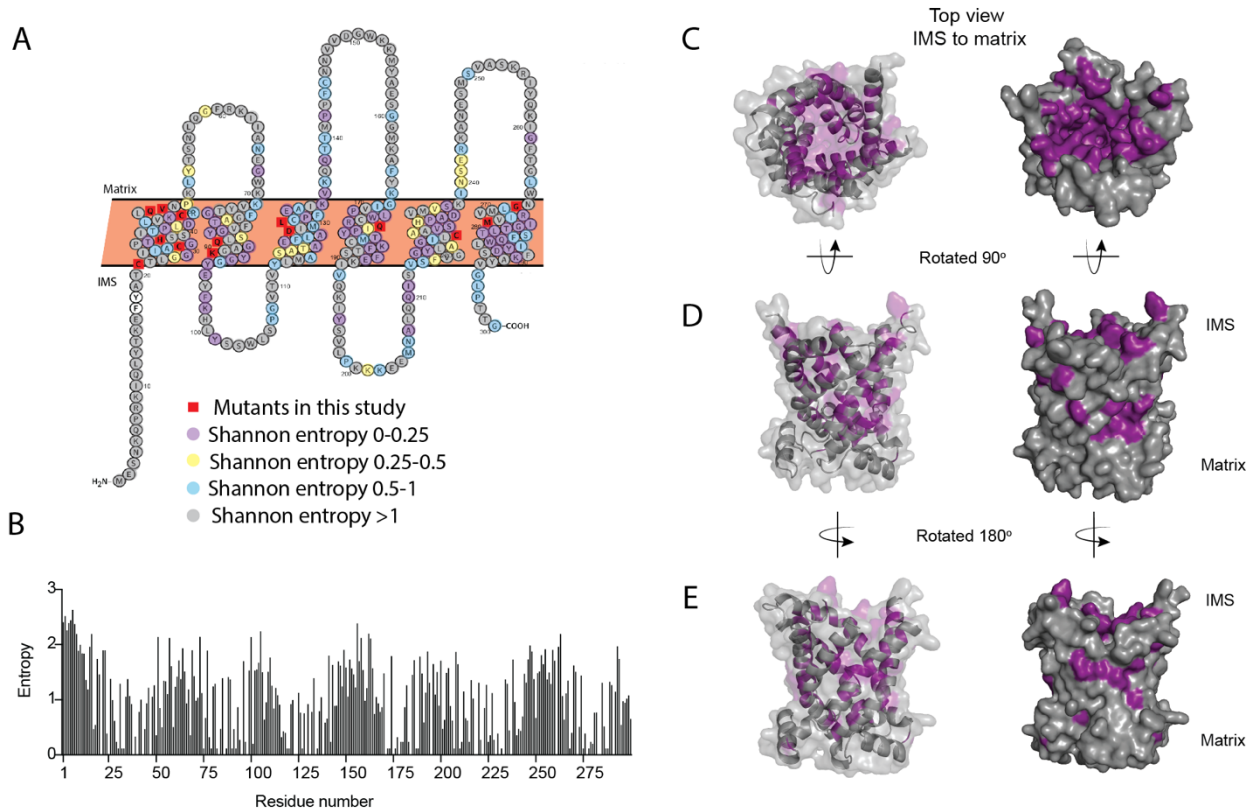

525  
526  
527  
528  
529  
530  
531  
532

**Figure 4: Conservation of residues in PIC2.** A) A Protter representation of the PIC2 amino acid sequence was generated and colored based on Shannon entropy scores for conservation of a given residue. B) The Shannon entropy for each residue in PIC2 based on all sequences in the PIC2 specific clade (see Supplemental Dataset S2). C) Structure of PIC2 in the c-state viewed from the IMS side, with residues with >0.5 Shannon entropy highlighted in purple and all other residues colored grey. D) 90° rotation of the structure to view it from side and E) a 180° rotation to view it from the opposite side.

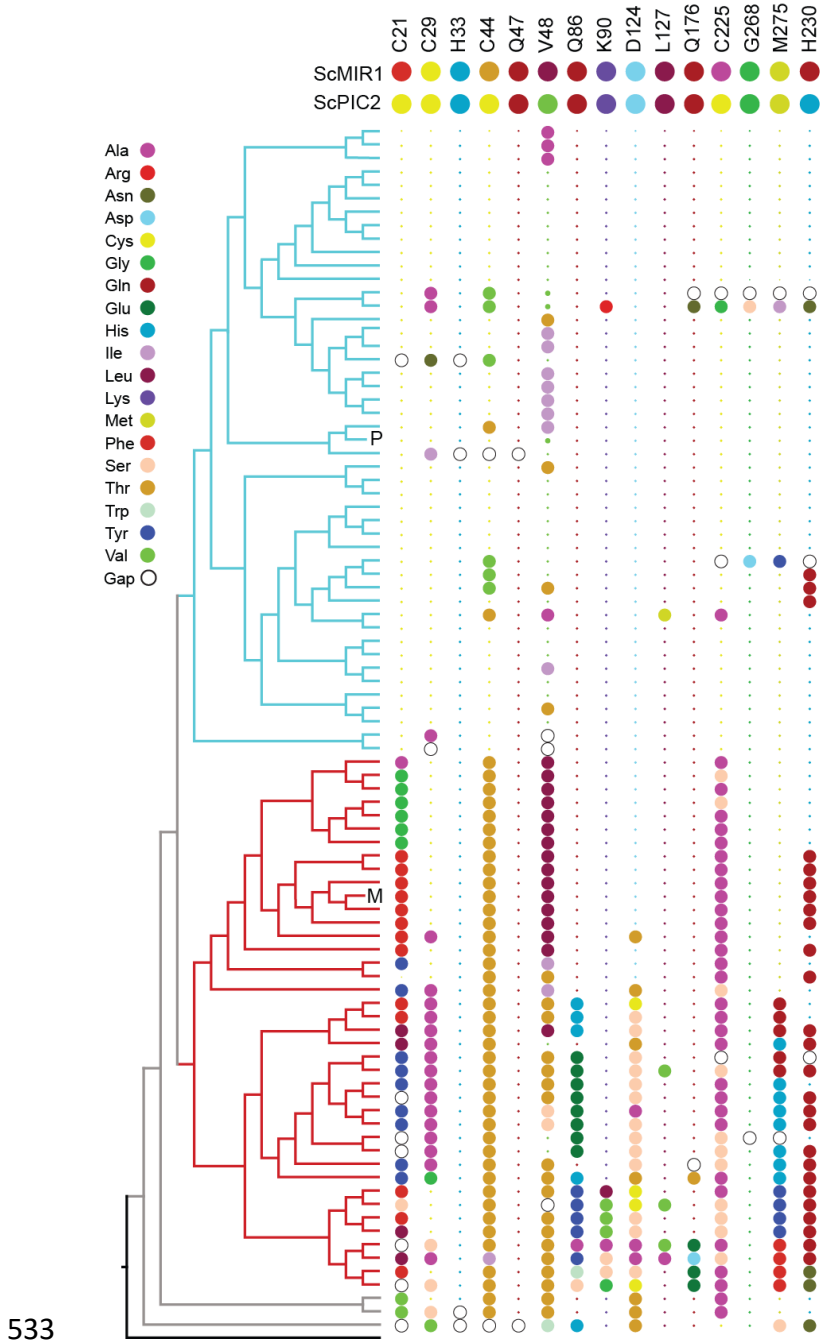

534 **Figure 5. Conservation of selected residues in the PIC2/MIR1 family of transporters.** The tree  
535 topology is identical to that shown in Figure 2. Amino acids are colored according to the key, and  
536 insertion/deletion events that lead to gaps within the alignment are indicated by the hollow  
537 circles. P indicates position of *S. cerevisiae* PIC2 and M indicates *S. cerevisiae* MIR1.  
538

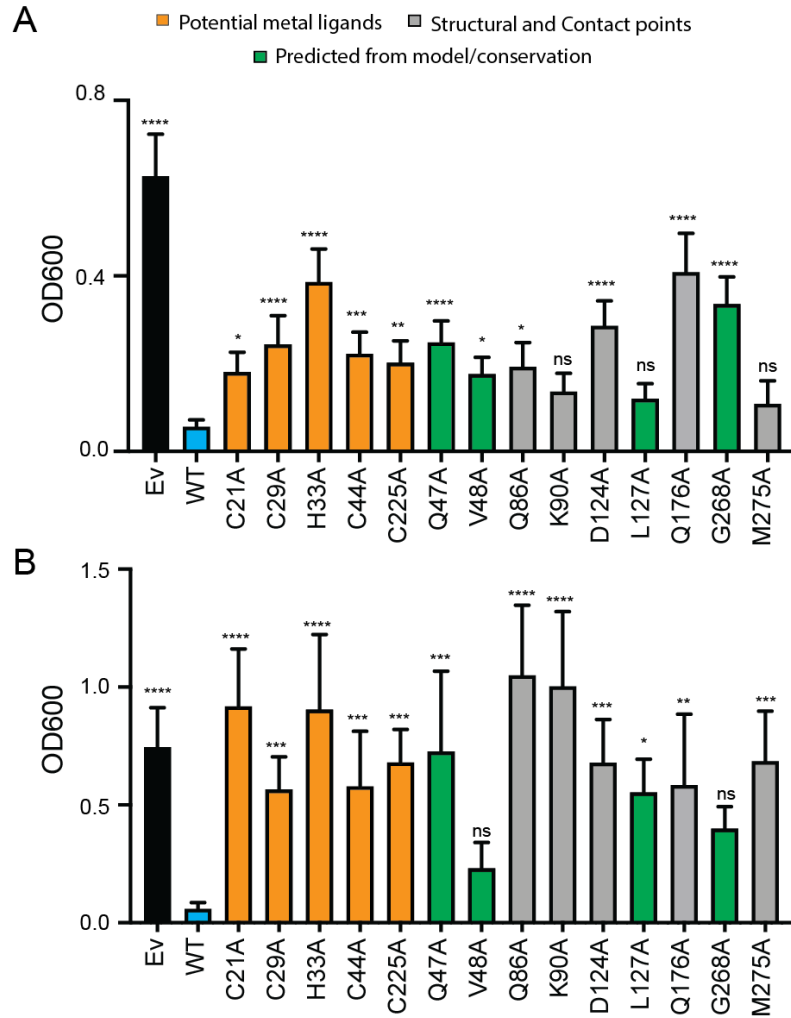

539  
540

541 **Figure 6: Expression of PIC2 and variants in *L. lactis*.** A) Growth of *L. lactis* expressing EV, wild-  
542 type PIC2 (WT) or a given PIC2 variant in which each of the listed residues was converted to an  
543 alanine in Ag<sup>+</sup> containing media. Each bar represents the median of 12 independent cultures  
544 with 95% confidence interval as error bars (\*, P < 0.05, \*\*, P < 0.01, \*\*\*, P < 0.001, \*\*\*\*,  
545 P < 0.0001 based on one-way ANOVA relative to PIC2 wild-type control). The color of the bar  
546 indicates one of three major groupings; Cu-binding (orange), structural motifs or contact points  
547 (grey) and evolutionarily conserved and present in channel of the transporter (green). B) As  
548 described in A) except *L. lactis* strains were grown in AsO<sub>4</sub><sup>3-</sup> containing media.



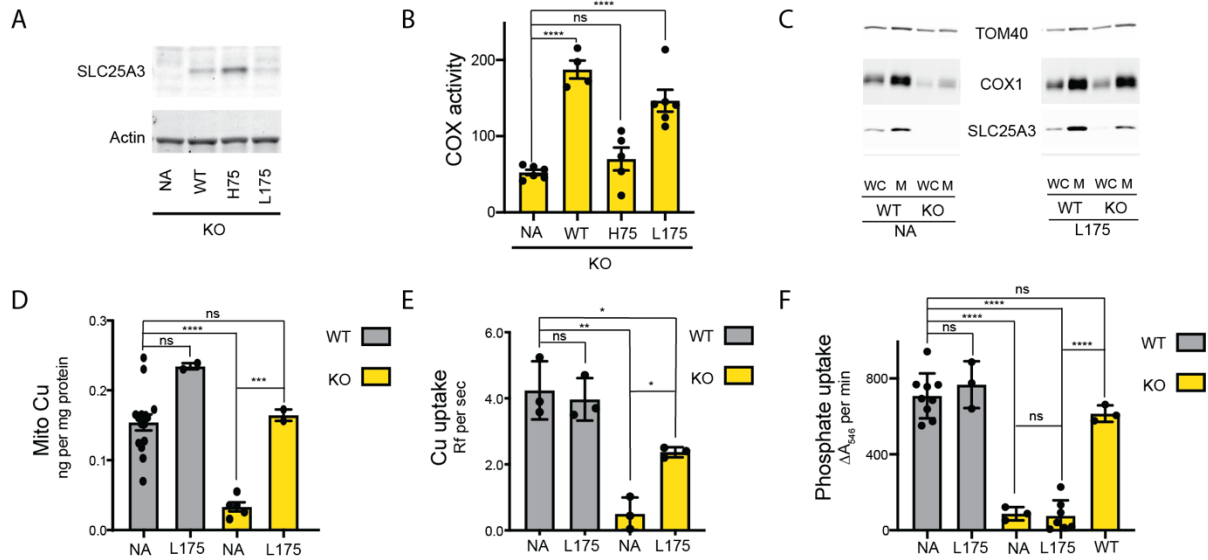

549  
550

551 **Figure 7: The SLC25A3 L175A variant restores mitochondrial Cu levels and rescues the COX**  
 552 **deficiency in KO MEFs.** *A*) Immunoblot analysis of SLC25A3 abundance in *Slc25a3* KO MEFs alone  
 553 or those transduced with wild-type SLC25A3 (WT), a His75Ala variant (H75) or a Leu175Ala  
 554 variant (L175). Actin served as an internal loading control. *B*) COX activity in KO MEFs alone (n =  
 555 6) or transduced with WT SLC25A3 (n = 4), a His75Ala variant (H75) (n=5) or a Leu175Ala variant  
 556 (L175) (n=6). ns, P>0.05, \*\*\*\*, and p < 0.0001 based on a one-way ANOVA. *C*) Immunoblot  
 557 analysis of SLC25A3, TOM40 and COX1 abundance in whole cells (WC) or isolated mitochondrial  
 558 (M) from WT or KO MEFs alone (NA) or transduced with the SLC25A3 Leu175Ala variant (L175).  
 559 *D*) Total Cu levels in mitochondria from WT or KO cells as in *C*), determined by ICP-OES. *E*) Cu  
 560 uptake in mitochondrially derived liposomes created by the membranes of mitochondria in *C*)  
 561 with additional lipids. Liposomes contain Phen green to monitor the uptake of Cu. *F*)  
 562 Mitochondrial swelling rate in presence of phosphate as a measure of phosphate uptake.

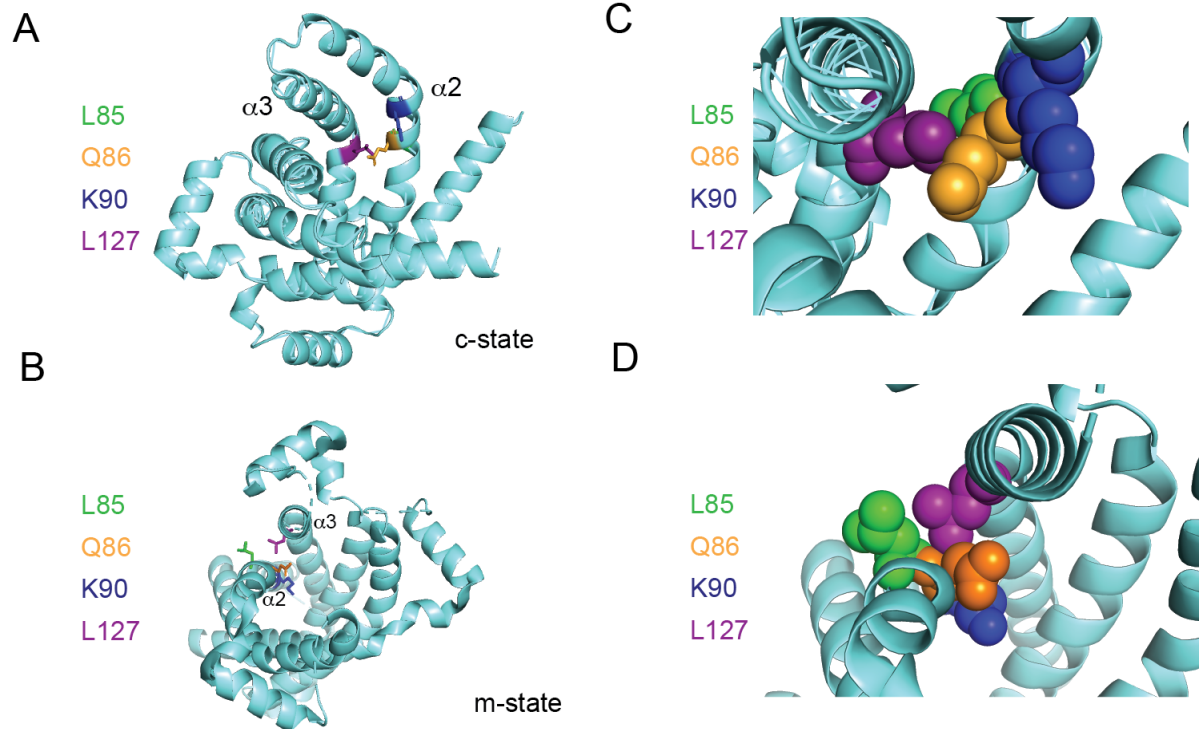

563

564

565 **Figure 8: Positioning of Leu127 relative to adjacent residues on helix 2.** Ribbon diagrams of PIC2  
566 A) c-state and B) m-state structures. The polypeptide is shown as a ribbon trace (aquamarine),  
567 the side chains as stick models. The Leu127 is colored purple to distinguish it from the adjacent  
568 Leu85 (green), Gln86 (orange) and Lys90 (blue) residues on helix 2 ( $\alpha 2$ ). Enlargement of the  
Leu127 interaction with the surrounding residues shown as spheres in C) c-state and D) m-state.

569 **Legends for Supplemental Figures and Tables**

570

571 **Dataset S1** (Supplemental Table 1.xlsx). The accession numbers of sequences analyzed in this  
572 study.

573 **Dataset S2** (Supplemental Table 2.xlsx). The comparison of PIC2 and MIR1 showing entropy  
574 scores and conservation of residues.

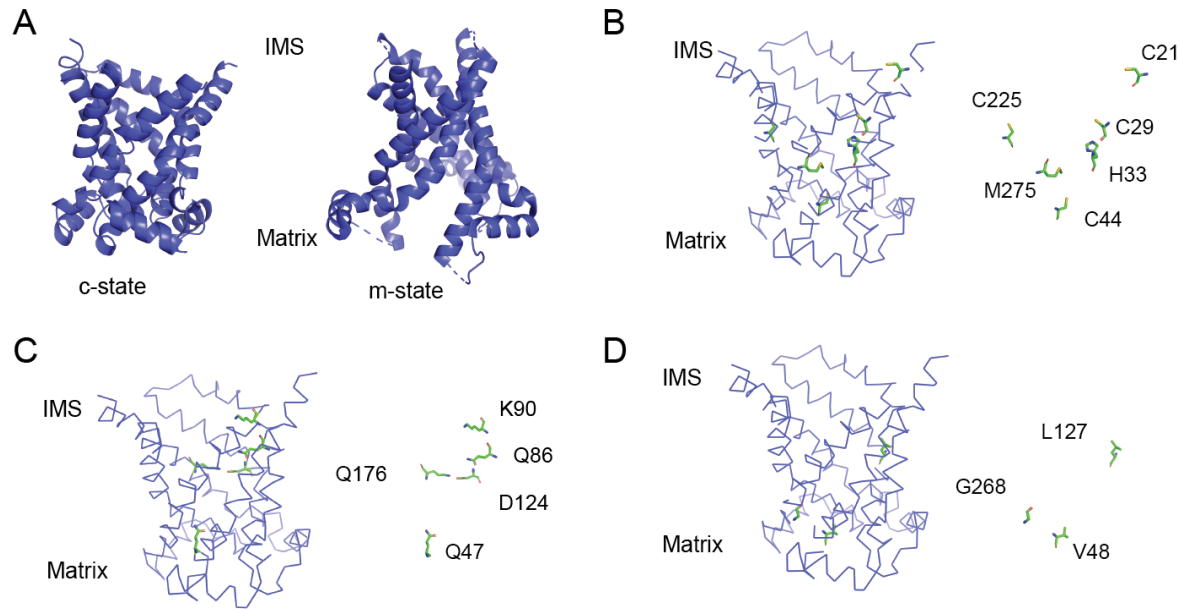

575

576

577 **Fig. S1.** Structural models of PIC2 and representation of the residues mutated in Fig. 6. A)  
578 Cartoon ribbon structure of PIC2 modelled onto ADP-ATP carrier in the c-state and m-state. B)  
579 Model of the c-state of PIC2 with C21, C29, C44, C225, H33, M275 highlighted in sticks format  
580 and with the backbone cartoon representation removed. C) Model of the c-state of PIC2 with  
581 K90, Q47, Q86, D124, Q176 highlighted in sticks format and with the backbone cartoon  
582 representation removed. D) Model of the c-state of PIC2 with V48, L127, G268 residues  
583 highlighted in sticks format and with the backbone cartoon representation removed.

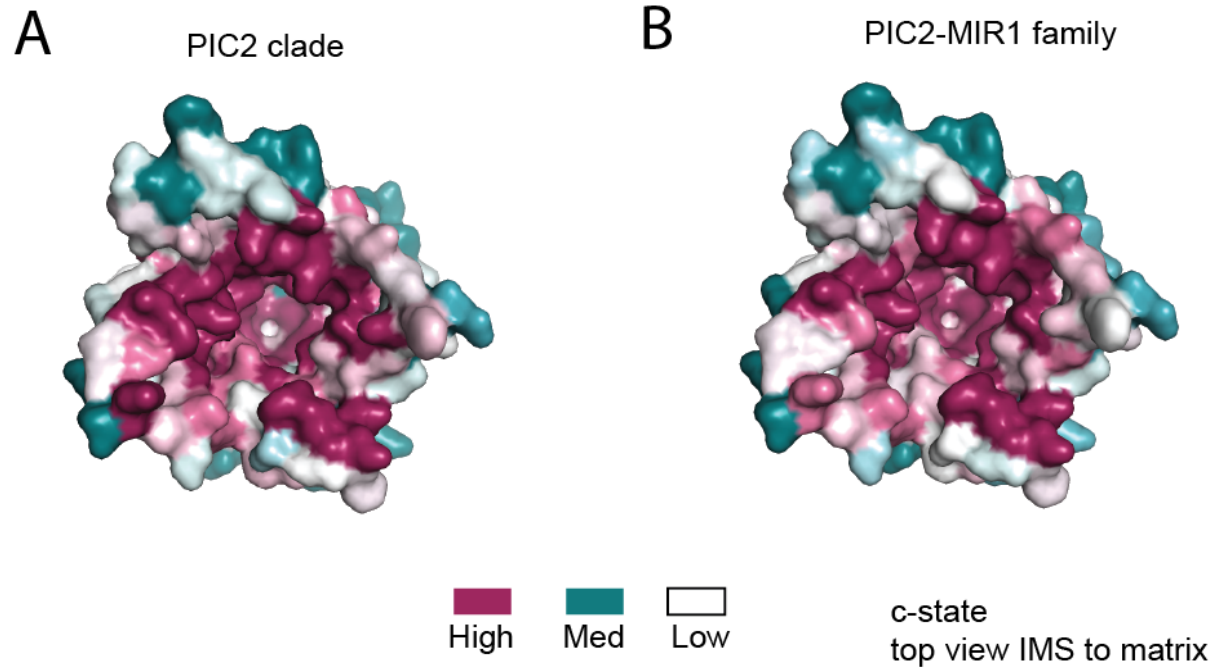

584

585

586

587

**Fig. S2.** Conservation surface of PIC2 viewed from the IMS. The c-state model of PIC2 with surface representation colored based on in the conservation PIC2 clade as defined in Fig. 3 or based on the complete PIC2-MIR1 family.

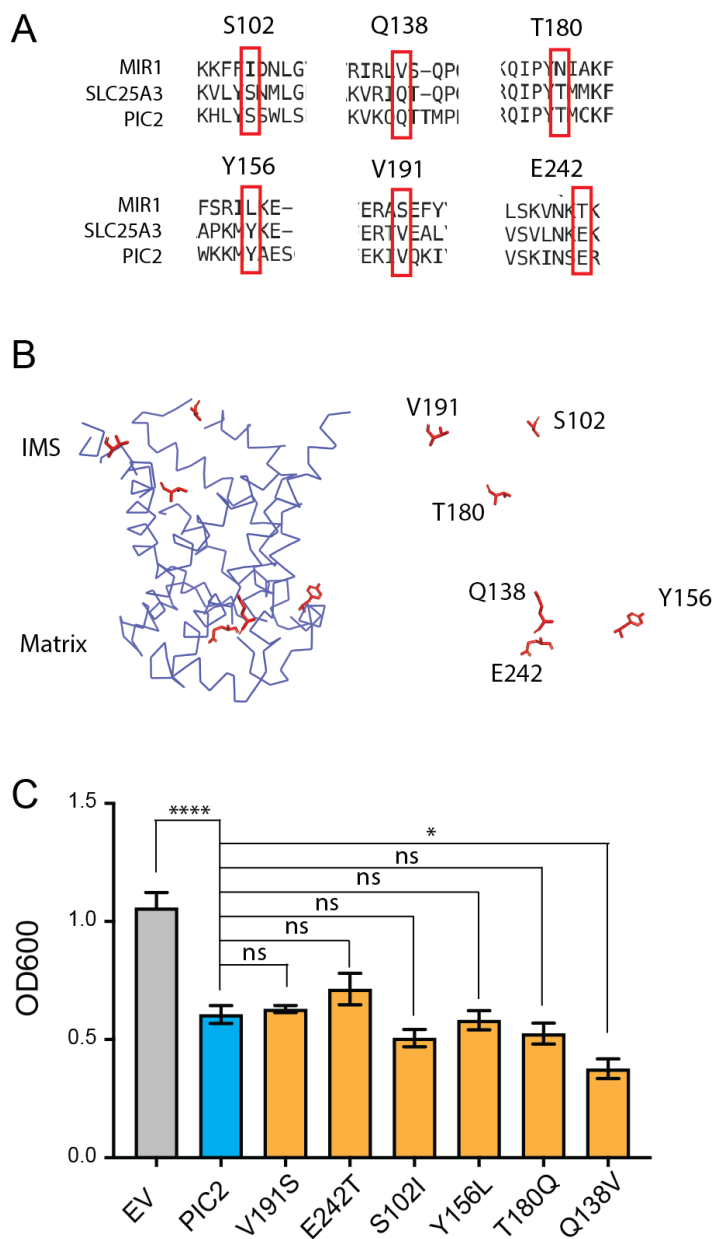

588  
589

**Fig. S3.** Substitution of PIC2 residues for MIR1 residues. A) Alignment of amino acid sequences from MIR1, PIC2 and SLC25A3 B) Model of the c-state of PIC2 with residues mutated highlighted in sticks format and with the backbone cartoon representation removed C) Growth of *L. lactis* expressing EV, wild-type PIC2 (WT) or a given PIC2 variant in which each of the listed residues was converted to an alanine in Ag<sup>+</sup> containing media. Each bar represents the median of 6 independent cultures with 95% confidence interval as error bars (\*, P < 0.05, \*\*, P < 0.01, \*\*\*, P < 0.001, \*\*\*\*, P < 0.0001 based on one-way ANOVA relative to PIC2 wild-type control).

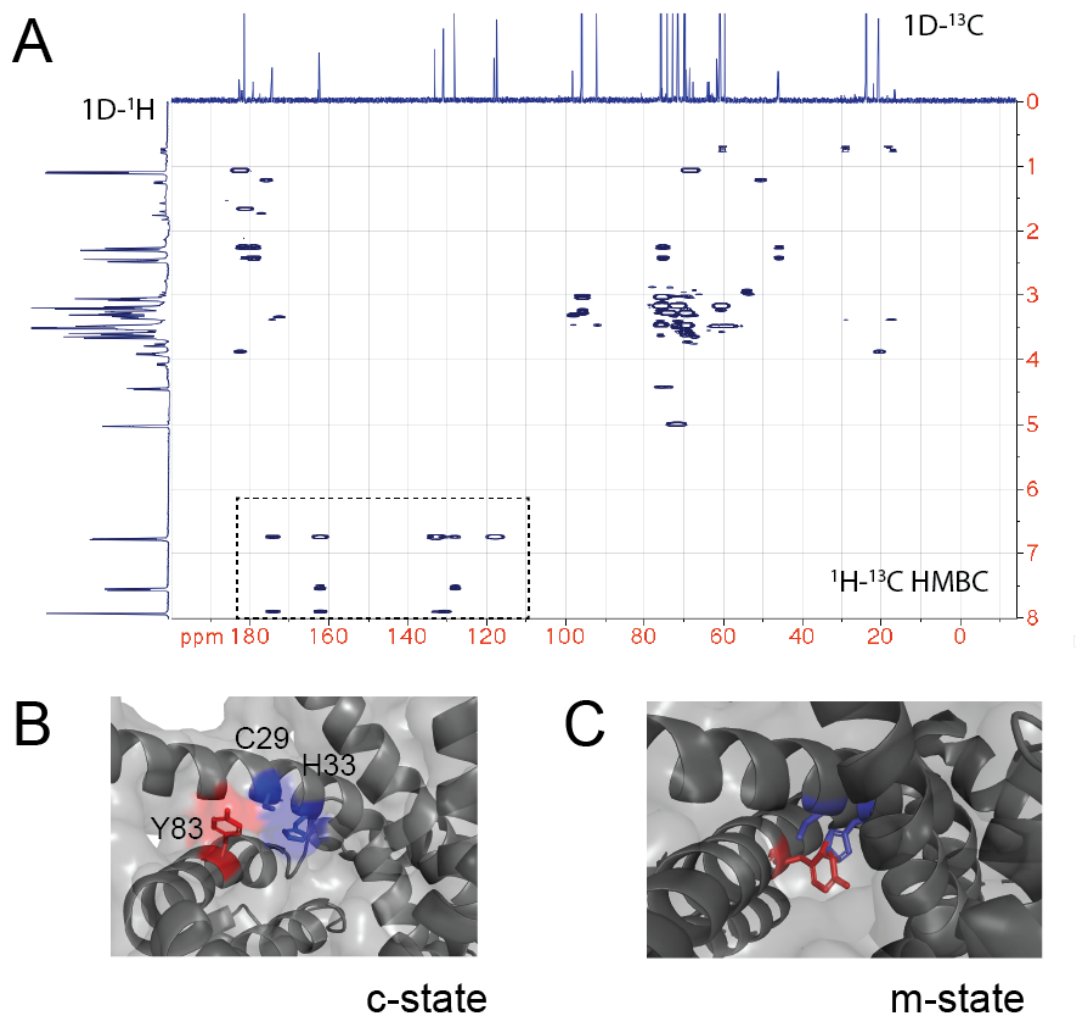

597

598 **Fig. S4.** NMR of the CuL and role of Y83 in interactions with the proposed C29-H33 binding site  
599 A)  $^1\text{H}$ - $^{13}\text{C}$  HMBC spectrum of the purified CuL complex. The 1D  $^1\text{H}$  and  $^{13}\text{C}$  spectrum are shown.  
600 The box highlights the signals consistent with a benzene ring in the CuL. B) Enlargement of the  
601 C29-H33 region of c-state with C29, H33 and Y83 shown in sticks. C) Enlargement of the C29-  
602 H33 region of m-state with C29, H33 and Y83 shown in sticks with Y83 between the C29-H33  
603 “replacing/occluding” a potential site for CuL binding.

**A** *Emiliana huxleyi* MIR1 duplications

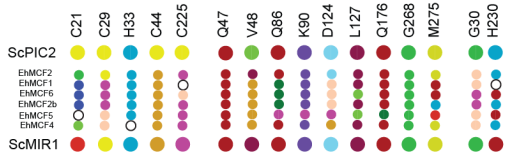

*Guillardia theta* MIR1 duplications

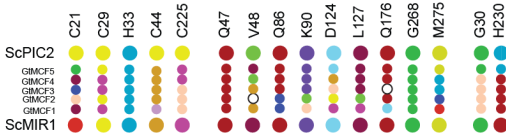

*Ustilago maydis* MIR1 duplications

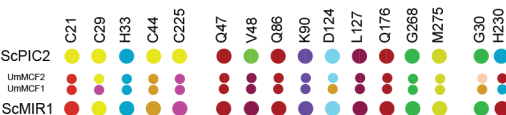

**B** *Oryza sativa* PIC2 duplications

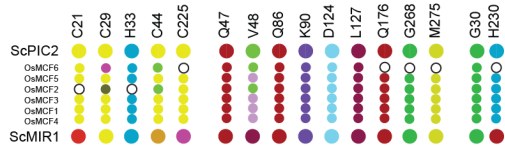

*Spizellomyces punctatus* PIC2 duplications

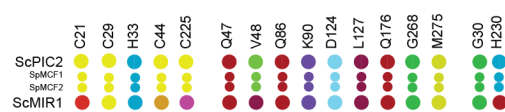

*Perkinsus marinus* PIC2 duplications

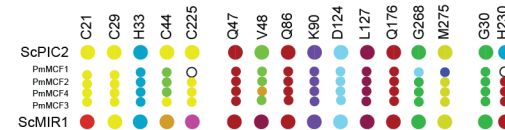

604  
605

606 **Fig. S5.** Map of the residues found in duplications. A) Graphical representation of the residues in  
607 organisms which have duplicated MIR1 and lack PIC2 B) Graphical representation of the residues  
608 in organisms that have duplicated PIC2 and lack MIR1.



## 609 References

- 610 1. F. Palmieri, P. Scarcia, M. Monne, Diseases Caused by Mutations in Mitochondrial  
611 Carrier Genes SLC25: A Review. *Biomolecules* **10** (2020).
- 612 2. C. N. Cunningham, J. Rutter, 20,000 picometers under the OMM: diving into the  
613 vastness of mitochondrial metabolite transport. *EMBO Rep* 10.15252/embr.202050071,  
614 e50071 (2020).
- 615 3. A. J. Robinson, C. Overy, E. R. Kunji, The mechanism of transport by mitochondrial  
616 carriers based on analysis of symmetry. *Proc Natl Acad Sci U S A* **105**, 17766-17771  
617 (2008).
- 618 4. J. J. Ruprecht, E. R. S. Kunji, The SLC25 Mitochondrial Carrier Family: Structure and  
619 Mechanism. *Trends Biochem Sci* **45**, 244-258 (2020).
- 620 5. G. N. Eick, J. T. Bridgham, D. P. Anderson, M. J. Harms, J. W. Thornton, Robustness of  
621 Reconstructed Ancestral Protein Functions to Statistical Uncertainty. *Mol Biol Evol* **34**,  
622 247-261 (2017).
- 623 6. G. N. Eick, J. K. Colucci, M. J. Harms, E. A. Ortlund, J. W. Thornton, Evolution of minimal  
624 specificity and promiscuity in steroid hormone receptors. *PLoS Genet* **8**, e1003072  
625 (2012).
- 626 7. F. Palmieri, The mitochondrial transporter family (SLC25): physiological and pathological  
627 implications. *Pflugers Arch* **447**, 689-709 (2004).
- 628 8. J. J. Ruprecht *et al.*, The Molecular Mechanism of Transport by the Mitochondrial  
629 ADP/ATP Carrier. *Cell* **176**, 435-447 e415 (2019).
- 630 9. E. Pebay-Peyroula *et al.*, Structure of mitochondrial ADP/ATP carrier in complex with  
631 carboxyatractyloside. *Nature* **426**, 39-44 (2003).
- 632 10. Z. N. Baker, P. A. Cobine, S. C. Leary, The mitochondrion: a central architect of copper  
633 homeostasis. *Metallomics* **9**, 1501-1512 (2017).
- 634 11. K. E. Vest, S. C. Leary, D. R. Winge, P. A. Cobine, Copper Import into the Mitochondrial  
635 Matrix in *Saccharomyces cerevisiae* is Mediated by Pic2, a Mitochondrial Carrier Family  
636 Protein. *J Biol Chem* **288** 23884-23892. (2013).
- 637 12. P. Hamel *et al.*, Redundancy in the function of mitochondrial phosphate transport in  
638 *Saccharomyces cerevisiae* and *Arabidopsis thaliana*. *Mol Microbiol* **51**, 307-317 (2004).
- 639 13. R. Takabatake, A. B. Siddique, H. Kouchi, K. Izui, S. Hata, Characterization of a  
640 *Saccharomyces cerevisiae* gene that encodes a mitochondrial phosphate transporter-  
641 like protein. *J Biochem* **129**, 827-833 (2001).
- 642 14. G. Fiermonte, V. Dolce, F. Palmieri, Expression in *Escherichia coli*, functional  
643 characterization, and tissue distribution of isoforms A and B of the phosphate carrier  
644 from bovine mitochondria. *J Biol Chem* **273**, 22782-22787 (1998).
- 645 15. H. V. Kolbe, D. Costello, A. Wong, R. C. Lu, H. Wohlrab, Mitochondrial phosphate  
646 transport. Large scale isolation and characterization of the phosphate transport protein  
647 from beef heart mitochondria. *J Biol Chem* **259**, 9115-9120 (1984).
- 648 16. A. Phelps, C. T. Schobert, H. Wohlrab, Cloning and characterization of the mitochondrial  
649 phosphate transport protein gene from the yeast *Saccharomyces cerevisiae*.  
650 *Biochemistry* **30**, 248-252 (1991).

- 651 17. A. Boulet *et al.*, The mammalian phosphate carrier SLC25A3 is a mitochondrial copper  
652 transporter required for cytochrome c oxidase biogenesis. *J Biol Chem* **293**, 1887-1896  
653 (2018).
- 654 18. J. Q. Kwong *et al.*, Genetic deletion of the mitochondrial phosphate carrier desensitizes  
655 the mitochondrial permeability transition pore and causes cardiomyopathy. *Cell Death*  
656 *Differ* **21**, 1209-1217 (2014).
- 657 19. H. Wohlrab, H. V. Kolbe, A. Collins, Isolation and reconstitution of the phosphate  
658 transport protein from mitochondria. *Methods Enzymol* **125**, 697-705 (1986).
- 659 20. M. Monne, K. W. Chan, D. J. Slotboom, E. R. Kunji, Functional expression of eukaryotic  
660 membrane proteins in *Lactococcus lactis*. *Protein Sci* **14**, 3048-3056 (2005).
- 661 21. K. E. Vest *et al.*, Overlap of copper and iron uptake systems in mitochondria in  
662 *Saccharomyces cerevisiae*. *Open Biol* **6**, 150223 (2016).
- 663 22. P. A. Cobine, S. A. Moore, S. C. Leary, Getting out what you put in: copper in  
664 mitochondria and its impacts on human disease. *BBA: Mol Cell Research* (2020).
- 665 23. V. A. Risso, J. A. Gavira, J. M. Sanchez-Ruiz, Thermostable and promiscuous Precambrian  
666 proteins. *Environ Microbiol* **16**, 1485-1489 (2014).
- 667 24. V. A. Risso, J. A. Gavira, D. F. Mejia-Carmona, E. A. Gaucher, J. M. Sanchez-Ruiz,  
668 Hyperstability and substrate promiscuity in laboratory resurrections of Precambrian  
669 beta-lactamases. *J Am Chem Soc* **135**, 2899-2902 (2013).
- 670 25. F. Burki, A. J. Roger, M. W. Brown, A. G. B. Simpson, The New Tree of Eukaryotes. *Trends*  
671 *Ecol Evol* **35**, 43-55 (2020).
- 672 26. A. Karnkowska *et al.*, The Oxymonad Genome Displays Canonical Eukaryotic Complexity  
673 in the Absence of a Mitochondrion. *Mol Biol Evol* **36**, 2292-2312 (2019).
- 674 27. A. Karnkowska *et al.*, A Eukaryote without a Mitochondrial Organelle. *Curr Biol* **26**, 1274-  
675 1284 (2016).
- 676 28. S. C. Dodani, S. C. Leary, P. A. Cobine, D. R. Winge, C. J. Chang, A targetable fluorescent  
677 sensor reveals that copper-deficient SCO1 and SCO2 patient cells prioritize  
678 mitochondrial copper homeostasis. *J Am Chem Soc* **133**, 8606-8616 (2011).
- 679 29. C. M. Marobbio *et al.*, Pathogenic potential of SLC25A15 mutations assessed by  
680 transport assays and complementation of *Saccharomyces cerevisiae* ORT1 null mutant.  
681 *Mol Genet Metab* **115**, 27-32 (2015).
- 682 30. C. M. Marobbio, G. Agrimi, F. M. Lasorsa, F. Palmieri, Identification and functional  
683 reconstitution of yeast mitochondrial carrier for S-adenosylmethionine. *EMBO J* **22**,  
684 5975-5982 (2003).
- 685 31. G. Fiermonte *et al.*, The mitochondrial ornithine transporter. Bacterial expression,  
686 reconstitution, functional characterization, and tissue distribution of two human  
687 isoforms. *J Biol Chem* **278**, 32778-32783 (2003).
- 688 32. S. Cavero *et al.*, Identification and metabolic role of the mitochondrial aspartate-  
689 glutamate transporter in *Saccharomyces cerevisiae*. *Mol Microbiol* **50**, 1257-1269  
690 (2003).
- 691 33. O. Catalina-Rodriguez *et al.*, The mitochondrial citrate transporter, CIC, is essential for  
692 mitochondrial homeostasis. *Oncotarget* **3**, 1220-1235 (2012).

- 693 34. E. L. Seifert *et al.*, Natural and Induced Mitochondrial Phosphate Carrier Loss:  
694 DIFFERENTIAL DEPENDENCE OF MITOCHONDRIAL METABOLISM AND DYNAMICS AND  
695 CELL SURVIVAL ON THE EXTENT OF DEPLETION. *J Biol Chem* **291**, 26126-26137 (2016).
- 696 35. E. J. Bhoj *et al.*, Pathologic Variants of the Mitochondrial Phosphate Carrier SLC25A3:  
697 Two New Patients and Expansion of the Cardiomyopathy/Skeletal Myopathy Phenotype  
698 With and Without Lactic Acidosis. *JIMD Rep* **19**, 59-66 (2015).
- 699 36. J. A. Mayr *et al.*, Deficiency of the mitochondrial phosphate carrier presenting as  
700 myopathy and cardiomyopathy in a family with three affected children. *Neuromuscul*  
701 *Disord* **21**, 803-808 (2011).
- 702 37. J. A. Mayr *et al.*, Mitochondrial phosphate-carrier deficiency: a novel disorder of  
703 oxidative phosphorylation. *Am J Hum Genet* **80**, 478-484 (2007).
- 704 38. M. C. Kuang, P. D. Hutchins, J. D. Russell, J. J. Coon, C. T. Hittinger, Ongoing resolution of  
705 duplicate gene functions shapes the diversification of a metabolic network. *Elife* **5**  
706 (2016).
- 707 39. G. C. Conant, J. A. Birchler, J. C. Pires, Dosage, duplication, and diploidization: clarifying  
708 the interplay of multiple models for duplicate gene evolution over time. *Curr Opin Plant*  
709 *Biol* **19**, 91-98 (2014).
- 710 40. L. Sandegren, D. I. Andersson, Bacterial gene amplification: implications for the  
711 evolution of antibiotic resistance. *Nat Rev Microbiol* **7**, 578-588 (2009).
- 712 41. G. C. Conant, K. H. Wolfe, Increased glycolytic flux as an outcome of whole-genome  
713 duplication in yeast. *Mol Syst Biol* **3** (2007).
- 714 42. C. T. Hittinger, S. B. Carroll, Gene duplication and the adaptive evolution of a classic  
715 genetic switch. *Nature* **449**, 677-U671 (2007).
- 716 43. J. Zhang, Y. P. Zhang, H. F. Rosenberg, Adaptive evolution of a duplicated pancreatic  
717 ribonuclease gene in a leaf-eating monkey. *Nat Genet* **30**, 411-415 (2002).
- 718 44. A. Force *et al.*, Preservation of duplicate genes by complementary, degenerative  
719 mutations. *Genetics* **151**, 1531-1545 (1999).
- 720 45. P. A. Cobine, L. D. Ojeda, K. M. Rigby, D. R. Winge, Yeast contain a non-proteinaceous  
721 pool of copper in the mitochondrial matrix. *J Biol Chem* **279**, 14447-14455 (2004).
- 722 46. X. Brazzolotto, F. Pierrel, L. Pelosi, Three conserved histidine residues contribute to  
723 mitochondrial iron transport through mitoferrins. *Biochem J* **460**, 79-89 (2014).
- 724 47. E. M. Froschauer, R. J. Schweyen, G. Wiesenberger, The yeast mitochondrial carrier  
725 proteins Mrs3p/Mrs4p mediate iron transport across the inner mitochondrial  
726 membrane. *Biochim Biophys Acta* **1788**, 1044-1050 (2009).
- 727 48. E. T. Christenson, A. S. Gallegos, A. Banerjee, In vitro reconstitution, functional  
728 dissection, and mutational analysis of metal ion transport by mitoferrin-1. *J Biol Chem*  
729 **293**, 3819-3828 (2018).
- 730 49. A. Jain, Z. S. Dashner, E. L. Connolly, Mitochondrial Iron Transporters (MIT1 and MIT2)  
731 Are Essential for Iron Homeostasis and Embryogenesis in *Arabidopsis thaliana*. *Front*  
732 *Plant Sci* **10**, 1449 (2019).
- 733 50. H. Wohlrab, V. Annese, A. Haeefe, Single replacement constructs of all hydroxyl, basic,  
734 and acidic amino acids identify new function and structure-sensitive regions of the  
735 mitochondrial phosphate transport protein. *Biochemistry* **41**, 3254-3261 (2002).

- 736 51. C. Briggs, L. Mincone, H. Wohlrab, Replacements of basic and hydroxyl amino acids  
737 identify structurally and functionally sensitive regions of the mitochondrial phosphate  
738 transport protein. *Biochemistry* **38**, 5096-5102 (1999).
- 739 52. A. Phelps, C. Briggs, L. Mincone, H. Wohlrab, Mitochondrial phosphate transport  
740 protein. replacements of glutamic, aspartic, and histidine residues affect transport and  
741 protein conformation and point to a coupled proton transport path. *Biochemistry* **35**,  
742 10757-10762 (1996).
- 743 53. H. Wohlrab, C. Briggs, Yeast mitochondrial phosphate transport protein expressed in  
744 Escherichia coli. Site-directed mutations at threonine-43 and at a similar location in the  
745 second tandem repeat (isoleucine-141). *Biochemistry* **33**, 9371-9375 (1994).
- 746 54. A. Phelps, H. Wohlrab, Mitochondrial phosphate transport. The *Saccharomyces*  
747 *cerevisiae* (threonine 43 to cysteine) mutant protein explicitly identifies transport with  
748 genomic sequence. *J Biol Chem* **266**, 19882-19885 (1991).
- 749 55. I. Martinez-Reyes, N. S. Chandel, Mitochondrial TCA cycle metabolites control  
750 physiology and disease. *Nat Commun* **11**, 102 (2020).
- 751 56. W. Xu, T. Barrientos, N. C. Andrews, Iron and copper in mitochondrial diseases. *Cell*  
752 *Metab* **17**, 319-328 (2013).
- 753 57. P. Tsvetkov *et al.*, Mitochondrial metabolism promotes adaptation to proteotoxic stress.  
754 *Nat Chem Biol* **15**, 681-689 (2019).
- 755 58. C. Vallieres, S. L. Holland, S. V. Avery, Mitochondrial Ferredoxin Determines Vulnerability  
756 of Cells to Copper Excess. *Cell Chem Biol* **24**, 1228-1237 e1223 (2017).
- 757 59. D. Brancaccio *et al.*, [4Fe-4S] Cluster Assembly in Mitochondria and Its Impairment by  
758 Copper. *J Am Chem Soc* **139**, 719-730 (2017).
- 759 60. S. C. Potter *et al.*, HMMER web server: 2018 update. *Nucleic Acids Res* **46**, W200-W204  
760 (2018).
- 761 61. Y. Huang, B. Niu, Y. Gao, L. Fu, W. Li, CD-HIT Suite: a web server for clustering and  
762 comparing biological sequences. *Bioinformatics* **26**, 680-682 (2010).
- 763 62. S. Kumar, G. Stecher, M. Li, C. Knyaz, K. Tamura, MEGA X: Molecular Evolutionary  
764 Genetics Analysis across Computing Platforms. *Mol Biol Evol* **35**, 1547-1549 (2018).
- 765 63. B. Q. Minh *et al.*, IQ-TREE 2: New Models and Efficient Methods for Phylogenetic  
766 Inference in the Genomic Era. *Mol Biol Evol* **37**, 1530-1534 (2020).
- 767 64. S. Kalyaanamoorthy, B. Q. Minh, T. K. F. Wong, A. von Haeseler, L. S. Jermin,  
768 ModelFinder: fast model selection for accurate phylogenetic estimates. *Nat Methods* **14**,  
769 587-589 (2017).
- 770 65. D. T. Hoang, O. Chernomor, A. von Haeseler, B. Q. Minh, L. S. Vinh, UFBoot2: Improving  
771 the Ultrafast Bootstrap Approximation. *Mol Biol Evol* **35**, 518-522 (2018).
- 772 66. P. Emsley, K. Cowtan, Coot: model-building tools for molecular graphics. *Acta Crystallogr*  
773 *D Biol Crystallogr* **60**, 2126-2132 (2004).
- 774 67. D. Liebschner *et al.*, Macromolecular structure determination using X-rays, neutrons and  
775 electrons: recent developments in Phenix. *Acta Crystallogr D* **75**, 861-877 (2019).
- 776
